# Carbohydrate-Binding Protein from Stinging Nettle as Fusion Inhibitor for SARS-CoV-2 Variants of Concern

1 Emiel Vanhulle<sup>1</sup>, Thomas D’huys<sup>1</sup>, Becky Provinciael<sup>1</sup>, Joren Stroobants<sup>1</sup>, Anita Camps<sup>1</sup>, Sam  
2 Noppen<sup>1</sup>, Dominique Schols<sup>1</sup>, Els J.M. Van Damme<sup>2</sup>, Piet Maes<sup>3</sup>, Annelies Stevaert<sup>1</sup> and Kurt  
3 Vermeire<sup>1,\*</sup>

4 <sup>1</sup>Laboratory of Virology and Chemotherapy, Rega Institute, Department of Microbiology, Immunology  
5 and Transplantation, KU Leuven, Leuven, Belgium

6 <sup>2</sup>Laboratory of Biochemistry and Glycobiology, Department of Biotechnology, Ghent University,  
7 Ghent, Belgium

8 <sup>3</sup>Laboratory of Clinical and Epidemiological Virology, Rega Institute, Department of Microbiology,  
9 Immunology and Transplantation, KU Leuven, Leuven, Belgium

10

11 **\* Correspondence:**

12 Kurt Vermeire

13 [kurt.vermeire@kuleuven.be](mailto:kurt.vermeire@kuleuven.be)

14 ORCID: Kurt Vermeire: 0000-0003-1123-1907

15

16 **Keywords: SARS-CoV-2, UDA, spike, fusion inhibitor, N-acetylglucosamine**

17 **Abstract**

18 *Urtica dioica* agglutinin (UDA) is a carbohydrate-binding small monomeric protein isolated from  
19 stinging nettle rhizomes. It inhibits replication of a broad range of viruses, including coronaviruses, in  
20 multiple cell types, with appealing selectivity. In this work, we investigated the potential of UDA as a  
21 broad-spectrum antiviral agent against SARS-CoV-2. UDA potently blocks entry of pseudotyped  
22 SARS-CoV-2 in A549.ACE2<sup>+</sup>-TMPRSS2 cells, with IC<sub>50</sub> values ranging from 0.32 to 1.22 μM.  
23 Furthermore, UDA prevents viral replication of the early Wuhan-Hu-1 strain in Vero E6 cells (IC<sub>50</sub> =  
24 225 nM), but also the replication of SARS-CoV-2 variants of concern, including Alpha, Beta and  
25 Gamma (IC<sub>50</sub> ranging from 115 to 171 nM). In addition, UDA exerts antiviral activity against the latest  
26 circulating Delta and Omicron variant in U87.ACE2<sup>+</sup> cells (IC<sub>50</sub> values are 1.6 and 0.9 μM,  
27 respectively). Importantly, when tested in Air-Liquid Interface (ALI) primary lung epithelial cell  
28 cultures, UDA preserves antiviral activity against SARS-CoV-2 (20A.EU2 variant) in the nanomolar  
29 range. Surface plasmon resonance (SPR) studies demonstrated a concentration-dependent binding of  
30 UDA to the viral spike protein of SARS-CoV-2, suggesting interference of UDA with cell attachment  
31 or subsequent virus entry. Moreover, in additional mechanistic studies with cell-cell fusion assays,  
32 UDA inhibited SARS-CoV-2 spike protein-mediated membrane fusion. Finally, pseudotyped SARS-  
33 CoV-2 mutants with N-glycosylation deletions in the S2 subunit of the spike protein remained sensitive  
34 to the antiviral activity of UDA. In conclusion, our data establish UDA as a potent and broad-spectrum  
35 fusion inhibitor for SARS-CoV-2.

## 36 1 Introduction

37 The severe acute respiratory syndrome coronavirus 2 (SARS-CoV-2) swiftly spread from the 41  
38 initially reported patients in Hubei province, China (1), to a global pandemic with 549 million  
39 confirmed cases (<https://covid19.who.int/>) and an estimated 18.2 million excess deaths in two years  
40 (2). Undoubtedly, Coronavirus Disease-2019 (COVID-19) presents an immense threat to the public  
41 health worldwide and the global economy. Several vaccines have already been approved, but  
42 worldwide vaccination coverage is still insufficient. In addition, current vaccines are suboptimal in  
43 preventing transmission, and novel variants of the virus with reduced susceptibility to the vaccines  
44 continue to emerge (3). Antivirals are a critical addition to the vaccination campaigns, to increase the  
45 resilience to SARS-CoV-2 infection, particularly in at-risk populations. Currently authorised COVID-  
46 19 therapeutics include remdesivir (4), ritonavir-boosted nirmatrelvir (Paxlovid) (5), molnupiravir (6),  
47 and certain anti-SARS-CoV-2 monoclonal antibodies (7).

48 SARS-CoV-2 entry in the host cell is mediated by its spike (S) protein, which is post-translationally  
49 cleaved into two subunits. The receptor-binding domain (RBD), which recognizes the angiotensin-  
50 converting enzyme 2 (ACE2) receptor (8), is located in the S1 subunit, while the S2 subunit harbours  
51 the fusion machinery. Cleavage at the S2' site, which renders the spike protein fusion-competent,  
52 occurs for most SARS-CoV-2 variants preferably at the cell surface by type II transmembrane serine  
53 proteases (TTSP) such as transmembrane protease serine 2 (TMPRSS2) (9). In contrast, the Omicron  
54 variant favours the alternative endosomal entry pathway, where fusion activation depends on  
55 cathepsins (10, 11). About 40 % of the spike protein surface is decorated by glycans, which shield the  
56 virus from the host innate immune system. In total, 22 *N*-linked glycosites and 17 *O*-glycosites were  
57 identified on the SARS-CoV-2 spike (12). Glycans mediate protein folding and facilitate immune  
58 evasion (13), impact viral infectivity (14, 15), spike stability, and processing of the viral envelope  
59 protein by host proteases (16, 17). Glycans can be bound by mammalian lectins (carbohydrate-binding  
60 proteins) which are often expressed on immune and endothelial cells and are involved in virus  
61 internalization and transmission (18). In addition, many non-mammalian lectins are endowed with  
62 antiviral activity.

63 Previous results from our research group established plant lectins as a unique class of antiviral  
64 molecules (18). One of those, *Urtica dioica* agglutinin (UDA), a lectin isolated from stinging nettle  
65 rhizomes, is a small (8.5 kDa) monomeric protein with high glycine, cysteine and tryptophan content  
66 (19-21). It comprises two hevein-like domains, each with a saccharide-binding site (22), and exhibits

67 carbohydrate-binding specificity for N-acetylglucosamine oligomers as well as high-mannose-type N-  
68 glycans (23, 24). UDA displays low cytotoxicity and potent antiviral activity against a wide spectrum  
69 of viruses; some examples are: human immunodeficiency virus (HIV) (25), cytomegalovirus (CMV)  
70 (25), respiratory syncytial virus (RSV) (25), influenza A and B virus (23, 25, 26), hepatitis C virus  
71 (27), herpes simplex virus (HSV) (23), dengue virus (DENV) (23, 28), and severe acute respiratory  
72 syndrome coronavirus (SARS-CoV) (29). Previous experiments with HIV, RSV and influenza virus  
73 have shown that UDA interferes with virus entry, presumably by hindering virus fusion (25, 26).

74 The ongoing COVID-19 pandemic highlights the need for a broad-spectrum antiviral that can be used  
75 immediately to rapidly diminish viral spread when an epidemic with a (re-)emerging virus occurs. We  
76 aimed to further explore and understand the broad and potent antiviral activity of UDA. Candidate  
77 SARS-CoV-2 entry inhibitors should be able to target both endosomal and TTSP-mediated cell surface  
78 entry, and show broad activity against different variants in different cell types. Hence, resolving its  
79 precise mechanism of action in detail is pivotal to decide whether the lectin is a potential broad-acting  
80 antiviral inhibitor. In the present study, we evaluate UDA against a panel of SARS-CoV-2 variants in  
81 different cell types and demonstrate a consistent antiviral activity of UDA against SARS-CoV-2. We  
82 propose membrane fusion as the possible target for antiviral intervention, identifying UDA as  
83 entry/fusion inhibitor for SARS-CoV-2.

## 84 2 Materials and methods

### 85 2.1 Cell lines, primary cells and virus strains

86 **Cell lines.** Human Embryonic Kidney 293T (HEK293T) cells (cat n° CRL-3216), African green  
87 monkey kidney Vero E6 cells (cat n° CRL-1586) and human adenocarcinomic alveolar epithelial cells  
88 A549 (cat n° CCL-185) were obtained from ATCC (Manassas, VA, USA) as mycoplasma-free stocks.  
89 Together with an in-house designed human glioblastoma cell line, stably expressing ACE2  
90 (U87.ACE2<sup>+</sup>) (30), these cells were grown in Dulbecco's Modified Eagle Medium (DMEM, Thermo  
91 Fisher Scientific (TFS)) supplemented with 10% (v/v) fetal bovine serum (FBS; Hyclone). A549 lung  
92 carcinoma cells expressing human ACE2 and human TMPRSS2 (A549.ACE2<sup>+</sup>.TMPRSS2<sup>+</sup>; cat n°  
93 a549-hace2tpsa, Invivogen) were grown in DMEM/10% FBS supplemented with 100 µg/ml  
94 Normocin, 0.5 µg/ml Puromycin and 300 µg/ml Hygromycin. Cell lines were maintained at 37°C in a  
95 humidified environment with 5% CO<sub>2</sub> and passaged every 3-4 days.

96 **Primary cells and air-liquid interface cultures.** SmallAir<sup>TM</sup> (cat n° EP21SA) and MucilAir<sup>TM</sup> (cat  
97 n° EP01MD, bronchial cell origin) were purchased from Epithelix Sàrl (Geneva, Switzerland) and  
98 maintained in SmallAir<sup>TM</sup> medium (cat n° EP65SA) and MucilAir<sup>TM</sup> medium (cat n° EP05MM),  
99 respectively. Medium of the ALI cultures was changed every other day and  
100 transepithelial/transendothelial electrical resistance (TEER) was measured on a regular base.

101 **Viruses.** All virus-related work was conducted in the high-containment biosafety level 3 facilities of  
102 the Rega Institute from the Katholieke Universiteit (KU) Leuven (Leuven, Belgium), in accordance  
103 with institutional guidelines. Severe acute respiratory syndrome coronavirus 2 (SARS-CoV-2) isolates  
104 were recovered from nasopharyngeal swabs of RT-qPCR-confirmed human cases obtained from the  
105 University Hospital (Leuven, Belgium). SARS-CoV-2 viral stocks were prepared by inoculation of  
106 confluent Vero E6 cells in DMEM supplemented with 2% (v/v) FBS, as described in detail (31).  
107 Recombinant SARS-CoV-2-GFP virus (Wuhan strain), as described in (32), was a kind gift of Dr.  
108 Volker Thiel (University of Bern, Switzerland). Titers were determined by tissue culture infectious  
109 dose 50 (TCID<sub>50</sub>) method of Reed and Muench (33) on Vero E6 and U87.ACE2<sup>+</sup> cells. Viral genome  
110 sequence was verified, and all infections were performed with passage 3 to 5 virus.

### 111 2.2 Antibodies and compounds

112 **Antibodies.** The following antibodies were used for western blotting: ACE2 Polyclonal Goat IgG (cat.  
113 n° AF933, R&D systems), anti-β-actin (cat. n° MA1-140, Invitrogen), HRP-labelled goat anti-mouse

114 immunoglobulin (IgG; cat. n° P0447, Dako). The following antibodies were used for flow cytometry:  
115 rabbit polyclonal SARS-CoV-2 nucleocapsid-specific antibody (cat. n° GTX135357, GeneTex), rabbit  
116 monoclonal SARS-CoV-2 spike-specific antibody [R001] (cat. n° 40592-R001, Sino Biological),  
117 mouse monoclonal SARS-CoV-2 spike-specific antibody [MM57] (cat. n° 40592-MM57, Sino  
118 Biological), mouse monoclonal SARS-CoV/SARS-CoV-2 spike-specific antibody [1A9] (cat. n°  
119 GTX632604, GeneTex), Alexa Fluor 647 (AF647)-labelled goat anti-rabbit IgG polyclonal antibody  
120 (cat. n° 4414, Cell Signaling Technologies), and phycoerythrin (PE)-labelled goat anti-mouse IgG (cat.  
121 n° 405307, BioLegend). The following antibodies were used for surface plasmon resonance studies:  
122 purified SARS-CoV-2 spike-specific monoclonal rabbit primary antibodies R001 and R007 (cat. n°  
123 40592-R001 and cat. n° 40150-R007, Sino Biological)

124 **Compounds.**; *Urtica dioica* agglutinin (UDA) from Stinging Nettle was from EY Laboratories, CA,  
125 USA (cat. n° L-8005-1).

### 126 **2.3 Plasmid construction**

127 pCAGGS.SARS-CoV-2\_SΔ19\_fpl\_mNG2(11)\_opt was generated using NEBuilder DNA assembly  
128 (New England Biolabs) of a pCAGGS vector backbone cleaved using EcoRV-HF and HindIII-HF  
129 (New England Biolabs) and a PCR fragment encoding a codon-optimized SARS-CoV-2 Wuhan-Hu-1  
130 spike protein (amplified from pCMV3-C-Myc; VG40589-CM, SinoBiological) with a C-terminal 19  
131 amino acid deletion as described in (34). A 12 amino acid flexible protein linker (fpl) and a modified  
132 11<sup>th</sup> betasheet of mNeonGreen (35) were added at the C-terminus. pCAGGS.BSD\_fpl\_mNG2(11) was  
133 generated using NEBuilder DNA assembly of a pCAGGS vector backbone cleaved using EcoRV-HF  
134 and HindIII-HF and the Blasticidin S deaminase gene (BSD) PCR amplified from a pLenti6.3 vector.  
135 Afterwards, cDNA encoding for a 12-amino acid fpl and a modified 11<sup>th</sup> betasheet of mNeonGreen  
136 were inserted at the 3' end of the insert ORF. pcDNA3.1.mNG2(1-10) was generated through  
137 NEBuilder DNA assembly of a pcDNA3.1 vector (TFS), amplified by PCR, and 10 betasheets of a  
138 modified mNeonGreen synthesized by Genscript. For pCAG3.1/SARS2-Sd19 PCR-amplified Wuhan-  
139 Hu-1 spike sequence (from pCMV3-C-Myc) was inserted via blunt end cloning in the pCAG3.1  
140 acceptor vector cut with EcoRV-HF.

### 141 **2.4 Immunoblotting**

142 Immunoblotting analysis was performed as previously reported (30). Cells were collected and lysed in  
143 ice-cold NP-40 lysis buffer (50 mM Tris-HCL (pH 8.0), 150 mM NaCl, and 1% Nonidet P-40)  
144 supplemented with cComplete Protease Inhibitor (Roche) and PMSF Protease Inhibitor (100 mM in dry

145 isopropanol, TFS). Cell lysates were centrifuged at 17,000 *g* for 10 min at 4°C to pellet nuclei and  
146 debris. For SDS gel electrophoresis, supernatant samples were boiled in reducing 2x Laemmli sample  
147 buffer (120 mM Tris-HCl (pH 6.8), 4% SDS, 20% glycerol, 100 mM dithiothreitol, and 0.02%  
148 bromophenol blue). Equal volumes of lysate were run on Criterion XT Bis-Tris gels (4–12%; Bio-Rad)  
149 at 170 V for 55 min using 1x XT-MES buffer (Bio-Rad), transferred to nitrocellulose membranes using  
150 the BioRad Trans-Blot Turbo transfer system (Bio-Rad). Membranes were blocked for 1 h with 5%  
151 non-fat dried milk in TBS-T (20 mM Tris-HCL (pH 7.6), 137 mM NaCl, and 0.05% Tween-20). After  
152 overnight incubation with primary antibody at 4°C, membranes were washed and incubated for 1h with  
153 secondary antibody.  $\beta$ -actin was used as a loading control. SuperSignal West Pico and Femto  
154 chemiluminescence reagent (Thermo Fisher scientific) was used for detection with a ChemiDoc MP  
155 system (Bio-Rad). Signal intensities were quantified with Image Lab software v5.0 (Bio-Rad).

## 156 **2.5 Wild type virus infection and antiviral assays**

157 One day prior to the experiment, Vero E6, A549.ACE2<sup>+</sup>-TMPRSS2 and U87.ACE2<sup>+</sup> cells were seeded  
158 in 96-well microtiter plates. Next day, 3- or 5-fold serial dilutions of the test compounds were prepared  
159 in virus infection media (same as cell culture medium, but with 2% FBS), overlaid on cells, and virus  
160 was added to each well (MOI indicated in the figure legends). Cells were incubated at 37°C under 5%  
161 CO<sub>2</sub> for the duration of the experiment. At various timepoints p.i., the virus-induced cytopathic effect  
162 (CPE) and GFP expression was microscopically evaluated and GFP<sup>+</sup> area was calculated as a  
163 percentage of the total cell area. Inhibition was calculated by comparison to virus control wells with  
164 no inhibitor added. IC<sub>50</sub> values were determined by interpolation. In case of subsequent analysis to  
165 quantify viral genome copy numbers with RT-qPCR, infected cells were washed with PBS at 2h post-  
166 infection to remove unbound virus, followed by incubation with freshly prepared 3- or 5-fold serial  
167 dilutions of compounds (for antiviral assay) at 37°C, 5% CO<sub>2</sub>. At various timepoints, supernatants were  
168 collected and stored at -80°C until further analysis.

169 Four days after infection, the cell viability of mock- and virus-infected U87.ACE2<sup>+</sup> cells was assessed  
170 spectrophotometrically via the in situ reduction of 3-(4,5-dimethylthiazol-2-yl)-5-(3-carboxy-  
171 methoxyphenyl)-2-(4-sulfophenyl)-2H-tetrazolium inner salt, using the CellTiter 96 AQueous One  
172 Solution Cell Proliferation Assay (Promega), as described before (30). The absorbances were read in  
173 an eight-channel computer-controlled photometer (Multiscan Ascent Reader, Labsystem, Helsinki,  
174 Finland) at two wavelengths (490 and 700 nm). The optical density (OD) of the samples was compared  
175 with sufficient cell control replicates (cells without virus and drugs) and virus control wells (cells with

176 virus but without drugs). The concentration that inhibited SARS-CoV-2-induced cell death by 50%  
177 (IC<sub>50</sub>) was calculated from interpolation.

## 178 **2.6 Virus infection of primary ALI cell cultures**

179 Prior to infection, duplicates of SmallAir™ and MucilAir™ reconstituted bronchial epithelium were  
180 washed twice with PBS warmed to 37°C to remove mucus and debris and basal media were replenished  
181 with warm cell culture media. Compound was added simultaneously with 2 x 10<sup>4</sup> TCID<sub>50</sub> of SARS-  
182 CoV-2 20.EU2 strain or a GFP-encoding Wuhan-Hu-1 variant (theoretical MOI of 0.3) to the apical  
183 compartment. Compound and virus were diluted in DMEM supplemented with 2% FBS and incubated  
184 at 37°C, 5% CO<sub>2</sub> for 2 h. Mock controls were exposed to the same volume of medium only.  
185 Subsequently, virus inoculum (with or without compound added) was removed and the apical  
186 compartment was washed twice with PBS to remove remaining unbound virus. The apical side of the  
187 ALI cultures were exposed to air till the end of the experiment, with an apical wash (with 200 µl PBS  
188 for 5 min at 37°C) at 24h p.i. Virus release was assessed in the apical wash at 4 days p.i.

## 189 **2.7 Viral RNA extraction and reverse transcription quantitative PCR (RT-qPCR)**

190 Supernatants and apical washes were harvested, viral particles were lysed and total RNA was extracted  
191 using QIAamp viral RNA mini kit (Qiagen, Switzerland) following manufacturer's instruction. Viral  
192 RNA was quantified using a duplex RT-qPCR assay, using the QuantStudio™5 Real-Time PCR  
193 system (Applied Biosystems), which has been described in detail (31). Briefly, all primers and probes  
194 were obtained from Integrated DNA Technologies (IDT, Leuven, Belgium). Final concentration of  
195 combined primer/probe mix consist of 500 nM forward and reverse primer and 250 nM probe. Viral E  
196 and N genes are simultaneously amplified and tested using a multiplex RT-qPCR. All the procedures  
197 follow the manufacturer's instructions of the Applied Biosystems TaqMan Fast Virus one-step  
198 mastermix (TFS). qPCR plate was read in the FAM and HEX channels using the following cycling  
199 protocol: 50°C for 5 min, 95°C for 20 sec, followed by 45 cycles of 95°C for 3 sec and 55°C for 30  
200 sec. A stabilized *in vitro* transcribed universal synthetic single stranded RNA of 880 nucleotides in  
201 buffer with known copy number concentration (Joint Research Centre, European Commission, cat. n°  
202 EURM-019) was used as a standard to quantitatively measure viral copy numbers.

## 203 **2.8 Immunofluorescence microscopy**

204 U87.ACE2<sup>+</sup> cells and ALI cultures of SmallAir™ cells were infected with a GFP-encoding SARS-  
205 CoV-2 variant. At indicated time-points, U87.ACE2<sup>+</sup> cells and ALI cultures were imaged with a



206 Primovert iLED inverted immunofluorescence microscope employing a 4X Plan-Achromat objective  
207 (Zeiss NTS Ltd). Representative images were captured in the green channel of the microscope to  
208 determine GFP expression. Images were processed and analyzed using the open-source image analysis  
209 software Fiji (36). In brief, images were added to a stack and converted to 8-bit. A threshold was set  
210 to separate background from GFP positive signal. GFP<sup>+</sup> area was calculated as a percentage of the total  
211 cell area.

## 212 **2.9 Cell-cell fusion assay**

213 HEK293T and A549.ACE2<sup>+</sup> cells were plated in 6-well plates to reach 50-70% and 80-90%  
214 confluency, respectively, after 24h incubation. Cells were transiently transfected using Lipofectamine  
215 LTX (Thermo Fisher Scientific) according to the manufacturer's protocol. Transfection mixes were  
216 prepared with 1.25 µg pCAGGS.SARS-CoV-2\_SΔ19\_fpl\_mNG2(11)\_opt plasmid and 1.25 µg  
217 pCAGGS.BSD\_fpl\_mNG2(11) for HEK293T transfection; and 2.5 µg pcDNA3.1.mNG2(1-10) for  
218 A549.ACE2<sup>+</sup> transfection. HEK293T cells were allowed to incubate for 24 h for efficient exogenous  
219 spike protein expression. At 6 h post transfection, transfected A549.ACE2<sup>+</sup> cells were digested with  
220 0.05% trypsin, washed, resuspended and counted on a Luna cell counter (Logos Biosystems), added to  
221 a 96-well plate at  $2.2 \times 10^4$  cells per well and incubated for 18 h. Transfected HEK293T cells were  
222 digested with 0.25% trypsin, washed, resuspended and then added to A549.ACE2<sup>+</sup> cells at  $2 \times 10^4$  cells  
223 per well. Next, cells were imaged for 24 h using the IncuCyte® S3 Live-Cell Analysis System  
224 (Sartorius) at 20 min intervals. Image processing was performed using the IncuCyte® software.

## 225 **2.10 Pseudovirus production**

226 Production of VSV luciferase-based pseudovirus was done as follows. At first, HEK293T cells were  
227 seeded in a type I collagen-coated T75 flask in DMEM supplemented with 10% FBS at  $3 \times 10^6$  cells  
228 per flask. The following day, the HEK293T cells were transfected with 30 µg of expression plasmid  
229 encoding the SARS-CoV-2 Wuhan-Hu-1 S protein (pCAG3.1/SARS2-Sd19) or Delta variant S protein  
230 (pUNO1-SpikeV8; Invivogen) using FuGENE HD transfection reagent (Promega, Madison, WI, USA)  
231 in a 3:1 FuGENE HD:DNA ratio. Cell transfection was allowed for 24h at 37°C, 5% CO<sub>2</sub>. On day 3,  
232 serum-containing medium was replaced by serum-free DMEM and cells were inoculated with MOI 3  
233 of VSVΔG\*/Luc-G (Kerafast, Boston, MA, USA) for the production of luciferase-expressing  
234 pseudotypes. Incubation with virus-containing medium was allowed for 1h at 37°C, 5% CO<sub>2</sub>.  
235 Thereafter, cells were gently washed once with PBS and fresh DMEM/10% FBS with anti-VSV-G  
236 antibody (1:1000) was added for overnight pseudovirus production. Cell culture supernatants

237 containing VSV pseudotyped with SARS-CoV-2 S protein (VSV-SARS2-Sd19/Luc) were collected at  
238 24h post-infection. Finally, supernatants were centrifuged for 10 min at 1000 g to remove cell debris,  
239 and filtered once through a 0.45  $\mu\text{m}$  pore size filter. Cleared supernatants containing SARS-CoV-2 S  
240 protein pseudotyped VSV particles were stored at  $-80^{\circ}\text{C}$ .

241 SARS-CoV-2 VLP production for GFP read-out was carried out as follows. Briefly, HEK293T cells  
242 were seeded in a 165  $\text{cm}^2$ -dish 24 h before transfection. Upon transfection, the HIV backbone plasmid  
243 (pCAGGs Gag-Pol), a reporter plasmid (pQCXIP-GFP) and a spike-expressing plasmid (pCAGGS-  
244 SARS-CoV-2-spike) were co-transfected into HEK293T cells using Fugene HD transfection reagentia  
245 (Promega) according to the manufacturer's guidelines. After 24h incubation ( $37^{\circ}\text{C}$ , 5%  $\text{CO}_2$ ), culture  
246 supernatant was discarded and fresh DMEM supplemented with 8% inactivated FBS and 1 mM sodium  
247 butyrate was added. After another 24h incubation period at  $37^{\circ}\text{C}$ , 5%  $\text{CO}_2$ , cell supernatant containing  
248 VLPs was collected and centrifuged at 1731 g for 10 min at  $25^{\circ}\text{C}$ . Then, supernatant was diluted (4 to  
249 1 ratio *v/v*) with PEG-*it* solution (SBI, System Biosciences), vortexed and incubated continuously  
250 rotating overnight at  $4^{\circ}\text{C}$ . After 24h, the VLP solution was centrifuged for 30 min at 3000 g at  $4^{\circ}\text{C}$  and  
251 the resulting pellet was resuspended in one-tenth of the original supernatant volume with DMEM/10%  
252 FBS (heat-inactivated). SARS-CoV-2 VLPs were aliquoted and stored at  $-80^{\circ}\text{C}$ .

## 253 **2.11 Pseudovirus transduction assay**

254 Pseudovirus transduction using (luciferase-based) SARS-CoV-2 spike pseudotyped VSV particles was  
255 performed as follows. A549.ACE2<sup>+</sup>.TMPRSS2<sup>+</sup> target cells (Invivogen) were seeded in a white, clear-  
256 bottom 96-well plate at  $1 \times 10^4$  cells/well. After overnight incubation, compounds serially diluted (2X)  
257 in cell culture medium (DMEM/10% FBS) were added to the target cells. SARS-CoV-2 Wuhan-Hu-1  
258 or Delta variant spike pseudotyped VSV (PV) particles were added to the target cells to reach a final  
259 infectious dose corresponding to the  $\text{CCID}_{50}$  of the virus stocks. Plates were then incubated at  $37^{\circ}\text{C}$   
260 and 5%  $\text{CO}_2$  for 22h to allow infection. The following day, supernatant was removed from the target  
261 cells and Bright-Glo assay reagent (Promega) was added and, after a 5 min incubation period at RT,  
262 luminescence was detected on a GloMax Navigator microplate reader (Promega).

263 Transduction with (GFP-based) SARS-CoV-2 spike pseudotyped VLPs was done as follows. One day  
264 prior to start of experiment, A549.ACE2<sup>+</sup> cells were first transfected with a plasmid expressing the  
265 TMPRSS2 gene. The next day, serial diluted compound was first incubated with VLPs for 30 min at  
266  $37^{\circ}\text{C}$ , before this mixture was added to the A549.ACE2<sup>+</sup>-TMPRSS cells seeded in 96-well plates. Four  
267 days after pseudovirus transduction, immunofluorescent images were captured with a EVOS M5000

268 microscope (Invitrogen, Thermo Fisher Scientific) using the EVOS GFP led cube, employing a 4X  
269 UPlanSApo objective. After images were captured, pseudovirus-infected cells were counted using the  
270 default microscope software, selecting a target and background noise. Results are expressed as %  
271 inhibition compared to a virus control condition.

## 272 **2.12 Flow cytometry**

273 Intracellular nucleocapsid staining of infected cells was done as previously described (31). Briefly,  
274 infected cells were collected, washed in PBS and centrifuged in a cooled centrifuge (4°C) at 500 g for  
275 5 min. After removal of the supernatant, cells were stained using a Fix/Perm kit (cat n° 554714, BD  
276 Biosciences). Cells were first fixed and permeabilized by the addition of 250 µL of BD  
277 Cytofix/Cytoperm buffer and incubated 20 min at 4°C. Samples were then washed twice with  
278 Perm/Wash buffer before the addition of the primary (anti-nucleocapsid) antibody (0.3 µg per sample).  
279 After a 30 min incubation at 4°C, samples were washed twice in BD Perm/Wash buffer, followed by a  
280 30 min incubation at 4°C with the secondary (labeled) antibody, and washed again. Finally, samples  
281 were stored in PBS/2% PFA. Sample acquisition was done on a BD FACSCelesta flow cytometer (BD  
282 Biosciences) with BD FACSDiva v8.0.1 software. FACS data analysis (including cell debris and  
283 doublet exclusion) was done using FlowJo v10.1 (Tree Star).

284 Flow cytometric analysis of spike expression levels was performed as follows. Spike-transfected  
285 HEK293T cells were first digested using Trypsin-EDTA 0.05%, washed in phosphate buffered saline  
286 (PBS) with 2% FBS and resuspended at  $3 \times 10^6$  cells per ml. For each sample,  $0.3 \times 10^6$  cells were  
287 preincubated with spike-specific monoclonal antibodies in PBS/FBS 2% for 30 min at RT. The cells  
288 were washed once in PBS/FBS 2% before incubation with the appropriate species reactive and labeled  
289 secondary antibodies. Following incubation (30 min at RT), cells were washed twice, resuspended in  
290 PBS containing 1% paraformaldehyde and analysed on a FACSCelesta flow cytometer (BD  
291 Biosciences). Data analysis was done using FlowJo v10.1 software (Tree Star).

## 292 **2.13 Surface plasmon resonance**

293 SPR technology (Biacore T200, Cytiva) was used to determine the binding kinetics and affinity of  
294 UDA to the wild-type Wuhan-Hu-1 (2019-nCoV spike protein, cat n° MBS8574721, Mybiosource)  
295 and Omicron (COV2 spike protein S recombinant B.1.1529 Omicron, cat n° MBS553745,  
296 Mybiosource) SARS-CoV-2 spike protein, as well as to the Wuhan-Hu-1 SARS-CoV-2 receptor  
297 binding domain (RBD). For the binding study with UDA, RBD (2019-nCoV spike RBD, cat n° 40592-  
298 VNAH, SinoBiological) was immobilized on a CM5 sensor chip using standard amine coupling in 10

299 mM HEPES (pH 7.0) to a level of approximately 300 RU. For the additional binding study with the  
300 spike-binding antibodies, histidine-tagged RBD (2019-nCoV spike RBD his tag, cat n° 40592-V08H,  
301 SinoBiological) was used. Histidine-tagged proteins were capture-coupled on a nitrilotriacetic acid  
302 (NTA) sensor chip (Cytiva). Briefly, the NTA surface was first activated with 0.5 mM Ni<sup>2+</sup> followed  
303 by a mixture of EDC/NHS to activate the carboxyl groups. Histidine-tagged proteins were diluted in  
304 HBS-P<sup>+</sup> (10 mM HEPES, 150 mM NaCl, 0.05% surfactant P20; pH 7.4) and capture-coupled onto the  
305 surface to a level of 100-300 RU. Finally, the surface was deactivated using 1.0 M ethanolamine-HCl  
306 pH 8.5 and regenerated with 350 mM EDTA to remove any remaining unbound ligand. Interaction  
307 studies between UDA and spike/RBD were performed at 25°C in HBS-EP<sup>+</sup> (10 mM HEPES, 150 mM  
308 NaCl, 3 mM EDTA, 0.05% surfactant P20; pH 7.4). Two-fold serial dilutions of UDA were injected  
309 at 30 µl/min using multiple cycle kinetics. 10 mM NaOH was used to regenerate the surface. Several  
310 buffer blanks were included for double referencing. The neutralizing R001 Ab and the non-neutralizing  
311 R007 Ab were used as positive controls for RBD binding. In addition, SPR technology was used to  
312 determine the inhibitory potential of UDA on the RBD/ACE2 binding. A biotin CAPture kit (Cytiva)  
313 was used to reversibly capture biotinylated ACE2 (SinoBiological) in HBS-EP<sup>+</sup> running buffer. The  
314 CAP sensor chip was first activated by injecting the Biotin CAPture reagent for 240 seconds (2 µl/min).  
315 Biotinylated ACE2 was captured onto the chip by injecting it for 180 seconds at a concentration of 5  
316 µg/ml (10 µl/min). RBD (50 nM) alone or premixed with 1 µM UDA was injected for 120 sec (30  
317 µL/min). RBD (50 nM) was also mixed with the spike neutralizing R001 Ab and the non-neutralizing  
318 R007 Ab at equimolar ratios. The surface was regenerated using the regeneration mix according to the  
319 manufacturer's instruction. Several buffer blanks were included for double referencing.

320 Apparent binding kinetics ( $K_D$ ,  $k_a$ ,  $k_d$ ) were derived after fitting the experimental data to the 1:1  
321 Langmuir binding model in the Biacore T200 Evaluation Software 3.1. The experiments were  
322 performed at least in duplicate.

## 323 **2.14 Statistical analysis**

324 Data were visualized as means ± standard deviation (SD) and were analyzed by making use of the  
325 GraphPad Prism 9.3.1 software.

### 326 3 Results

#### 327 3.1 Antiviral activity of UDA against pseudotyped SARS-CoV-2

328 The plant lectin UDA was initially evaluated against pseudotyped SARS-CoV-2. First, lung epithelial  
329 A549 cells were stably transduced with a lentivector encoding the ACE2 receptor, to enhance their  
330 sensitivity to SARS-CoV-2, as described recently for the U87 cell line (30). As shown in  
331 **Supplementary Figure 1**, the resulting A549.ACE2<sup>+</sup> cells expressed high and stable ACE2 levels as  
332 evidenced by the dense protein bands on the immunoblot. Next, these A549.ACE2<sup>+</sup> cells were  
333 transiently transfected with a plasmid encoding the cellular protease TMPRSS2, which promotes viral  
334 entry through plasma membrane fusion (9).

335 The A549.ACE2<sup>+</sup>-TMPRSS2 cells were subsequently transduced with SARS-CoV-2 virus-like  
336 particles (VLPs) that carried the spike protein of the early Wuhan-Hu-1 strain and a GFP reporter.  
337 Interestingly, SARS-CoV-2 pseudovirus entry, evidenced by GFP expression in the transduced cells  
338 (**Figure 1A**), was profound and concentration-dependent inhibited by UDA, returning an IC<sub>50</sub> value of  
339 0.32 μM (**Figure 1B**). In addition, UDA activity was confirmed in a luciferase-based assay in  
340 A549.ACE2<sup>+</sup>.TMPRSS2<sup>+</sup> cells (**Figure 1C**), showing a comparable, slightly higher IC<sub>50</sub> value of 1.22  
341 μM.

#### 342 3.2 Broad spectrum antiviral activity of UDA against SARS-CoV-2 variants of concern

343 Next, the antiviral potency of UDA was evaluated against wild-type virus, as described recently (31).  
344 Briefly, Vero E6 cells were infected with clinical isolates of SARS-CoV-2 in the presence of UDA,  
345 and viral RNA was measured in the supernatant at day 3 post infection (p.i.). As shown in **Figure 2A**  
346 and **2B**, UDA inhibited SARS-CoV-2 replication in Vero E6 cells in a concentration-dependent  
347 manner, with IC<sub>50</sub> values in the high nanomolar range (115-225 nM; **Table 1**). Importantly, UDA  
348 demonstrated antiviral activity against all tested variants, including Wuhan-Hu-1, 20A.EU2, and  
349 variants of concern (VOCs) Alpha (UK), Beta (South-African) and Gamma (Brazilian) (**Table 1**). At  
350 a concentration of 2 μM, UDA fully protects against SARS-CoV-2 infection, as confirmed by flow  
351 cytometric analysis of viral N protein expression in Vero E6 cells infected with the Gamma strain  
352 (**Figure 2C**).

353 In addition, we also tested UDA against the latest circulating Delta and Omicron variant. In order to  
354 get successful infection of the cells with Omicron SARS-CoV-2, we employed the glioblastoma cell  
355 line U87.ACE2<sup>+</sup> which is highly permissive to SARS-CoV-2, as recently reported (30). As shown in  
356 **Figure 2D**, UDA preserved antiviral activity against SARS-CoV-2 in the U87.ACE2<sup>+</sup> cells as

357 evidenced by the reduced GFP expression in the cells exposed to a GFP-expressing Wuhan-Hu-1  
358 variant. However, UDA was less potent against wild-type Wuhan-Hu-1 in the U87.ACE2<sup>+</sup> cells (IC<sub>50</sub>  
359 value of 984 nM; **Table 1**) as compared to the Vero E6 cells (IC<sub>50</sub> value of 225 nM). Importantly, UDA  
360 also exerted antiviral activity against the Delta and Omicron VOCs (IC<sub>50</sub> values of 1555 nM and 867  
361 nM, respectively; **Table 1**), although with slightly reduced potency against Delta as compared to  
362 Wuhan-Hu-1, which is in line with the data obtained with pseudotyped Delta SARS-CoV-2  
363 (**Supplementary Figure 2**). Nevertheless, these results demonstrate a broad-spectrum antiviral  
364 activity, including against the circulating and more infectious SARS-CoV-2 species.

365 As SARS-CoV-2 infection of Vero E6 and U87.ACE2<sup>+</sup> cells mainly occurs via the endosomal entry  
366 route, we next evaluated the antiviral activity of UDA in our A549.ACE2<sup>+</sup>-TMPRSS2 cells, where the  
367 virus follows the cell surface entry route. Here, UDA also yielded full protection of virus infection at  
368 the highest concentration, as determined by flow cytometry (**Figure 3A**) and RT-qPCR (**Figure 3B**),  
369 with IC<sub>50</sub> values of 40 and 96 nM for variants Wuhan-Hu-1 and 20A.EU2, respectively (**Table 1**).

370 To further address the antiviral potency of UDA, we evaluated its antiviral activity in differentiated  
371 cells in 3D like structures that are exposed to air, the so-called air-liquid-interface (ALI) cultures. In  
372 this experimental setting, the virus (in the absence or presence of compound) is only briefly (2h) added  
373 to the apical side of the cells, and viral replication is monitored by GFP expression or RT-qPCR at day  
374 4 p.i. We used the human primary upper (MucilAir) and lower (SmallAir) airway epithelial cultures  
375 (from healthy donors), to create a more clinically relevant setting. Interestingly, even a short treatment  
376 of the virus with UDA at the time of infection strongly prevented the infection of ALI cultures of  
377 primary cells. As illustrated in **Figure 3C**, UDA yielded full protection of SARS-CoV-2 infection  
378 (GFP-expressing Wuhan-Hu-1 variant) in the SmallAir ALI cultures at 0.4 μM, as evidenced by the  
379 absence of GFP expression. Notably, RT-qPCR analysis of the apical washes revealed a stronger  
380 antiviral effect of UDA in SmallAir cultures infected with the 20A.EU2 variant (IC<sub>50</sub> < 16 nM; more  
381 than 50% protection at the lowest tested UDA concentration of 16 nM), as compared to MucilAir  
382 cultures (IC<sub>50</sub> = 272 ± 155 nM; n=2). To conclude, both viral entry routes can be efficiently blocked  
383 by UDA, which demonstrated a wide-spectrum antiviral activity against SARS-CoV-2 in different cell  
384 types.

### 385 **3.3 Surface plasmon resonance analysis of UDA binding to SARS-CoV-2 spike protein**

386 UDA is a carbohydrate binding agent, that has a preference for GlcNAc and high-mannose sugars on  
387 target glycoproteins (23, 24). As both the SARS-CoV-2 spike protein and ACE2 receptor are heavily  
388 glycosylated (37-40), UDA could possibly bind to both. Thus, we used surface plasmon resonance

389 (SPR) to determine what domain of the viral S protein and/or cellular receptor is responsible for the  
390 antiviral activity of UDA. As expected, there was a clear concentration-dependent binding of UDA to  
391 monomeric spike protein of the early Wuhan-Hu-1 strain (**Figure 4A**), with a mean  $K_D$  of 7 nM  
392 (**Supplementary Figure 3A**), and also to the spike protein of the latest Omicron variant (mean  $K_D$  of  
393 11 nM; **Supplementary Figure 3A** and **3B**). However, the binding of UDA to the receptor binding  
394 domain (RBD) of the S protein was weaker as compared to full-length spike, with a fast off-rate  
395 (**Figure 4B**), indicative of a transient interaction of UDA to RBD (mean  $K_D$  of 22 nM; **Supplementary**  
396 **Figure 3A**). Furthermore, RBD with bound UDA could still bind to ACE2 (**Figure 4C**; slightly higher  
397 response of RBD + UDA compared to RBD alone). The same was seen for non-neutralizing control  
398 antibody R007, while spike-neutralizing antibody R001 completely blocked the binding of RBD to the  
399 ACE2 receptor (**Figure 4C** and **Supplementary Figure 3C**), in line with its antiviral activity against  
400 SARS-CoV-2 in Vero E6 cells, as recently described (31). In addition, UDA did not bind to the ACE2  
401 receptor (**Figure 4C**). These data demonstrate that UDA is not acting as a direct receptor-attachment  
402 competitor, and its strongest interaction site is not located in the RBD.

### 403 **3.4 UDA inhibits SARS-CoV-2 spike-mediated cell-cell fusion**

404 To further investigate the specific molecular target of UDA in SARS-CoV-2 entry, we next tested the  
405 potential of UDA in preventing cell-cell fusion by means of a split neongreen molecular system  
406 (**Supplementary Figure 4A**). Here, one part of neongreen (i.e., the first 10 beta-sheets) is expressed  
407 in the cytosol of A549.ACE2<sup>+</sup> acceptor cells, and the other part (i.e., the remaining 11<sup>th</sup> beta-sheet) is  
408 co-expressed with spike protein in HEK293T donor cells. As shown in **Figure 5**, a profound cell-cell  
409 fusion occurred in the control condition with the generation of multinucleated giant cells, as evidenced  
410 by the abundant neongreen expression. Cell-cell fusion was already visible within a few hours after  
411 cell overlay (see also **Supplementary movie**). In the presence of 5  $\mu$ M of UDA, only few neongreen-  
412 positive syncytia could be observed, and the syncytia remained small in size, indicative of limited cells  
413 that were involved in syncytium formation (**Figure 5**). The inhibitory effect of UDA on cell-cell fusion  
414 was concentration-dependent. As expected, control HEK293T cells transfected with only the 11<sup>th</sup> beta-  
415 sheet (thus, not expressing the spike protein) were not capable to fuse with the complementary ACE2-  
416 positive cells (**Figure 5**).

417 Whereas treatment of the HEK293T cells with UDA before the overlay on A549.ACE2<sup>+</sup> cells  
418 prevented syncytia formation, pretreatment of the spike-transfected HEK293T cells with UDA (and  
419 removal of unbound UDA) did not inhibit cell-cell fusion to the same extent (**Figure 5**). The 5  $\mu$ M

420 UDA treatment did reduce the syncytia, as evidenced by the limited expression of neongreen over time  
421 (**Supplementary Figure 4B**), whereas 1  $\mu\text{M}$  of UDA failed to prevent cell-cell fusion. Pretreatment  
422 of the spike-transfected HEK293T cells with UDA (without lectin wash-out) before the overlay on the  
423 A549.ACE2<sup>+</sup> cells had no additional effect on fusion inhibition (**Supplementary Figure 4B**; compare  
424 0.2  $\mu\text{M}$  UDA samples). These results indicate that the presence of UDA is required during the fusion  
425 process to exert its inhibitory effect. Also, pretreatment of the A549.ACE2<sup>+</sup> acceptor cell monolayer  
426 with 5  $\mu\text{M}$  of UDA (and removal of unbound UDA) did not inhibit cell-cell fusion, as only a small  
427 reduction in neongreen signal was observed (**Figure 5** and **Supplementary Figure 4B**). Hence,  
428 putative binding of UDA to the cellular receptors (and/or cell surface of the target cells) is not sufficient  
429 to prevent membrane fusion elicited by the SARS-CoV-2 spike protein.

### 430 **3.5 Analysis of UDA interaction with glycan mutants of SARS-CoV-2 spike protein**

431 Finally, we wanted to investigate which carbohydrates on the spike protein are involved in UDA  
432 binding. Given that a strong effect of UDA was seen on spike-mediated cell-cell fusion, we primarily  
433 analysed the contribution of the glycans on the S2 subunit of the spike protein. To accelerate our  
434 analysis, we generated spike mutants that contained two or three deletions of adjacent glycosylation  
435 sites (see scheme in **Figure 6**). We started with the construction and analysis of the following three  
436 mutants: N1074Q + N1098Q; N1134Q + N1158Q; and N1173Q + N1194Q. These mutant spike  
437 proteins were subsequently used to generate VLPs for transduction of A549.ACE2<sup>+</sup>-TMPRSS2 cells.  
438 As summarized in **Table 2**, UDA kept full activity against these mutant VLPs, suggesting that antiviral  
439 activity of UDA is not related to interaction with a single glycan in the C-terminal domain of the SARS-  
440 CoV-2 spike S2 subunit (**Figure 6**). Deletion of the three glycosylation sites in the N-terminal domain  
441 of the S2 subunit (i.e., mutant N709Q + N717Q + N801Q) resulted in low cell surface expression of  
442 the mutant spike protein (**Supplementary Figure 5**), and consequently, in unsuccessful production of  
443 pseudotyped virus. However, mutation N709Q in combination with deletion of the N234 glycosylation  
444 site (located in S1, and the only site within the spike that carries exclusively oligo-mannose glycans  
445 with up to 9 mannose residues (41)), resulted in comparable or even enhanced spike expression as  
446 compared to WT, depending on the specific anti-S antibody used (**Supplementary Figure 5**). As listed  
447 in **Table 2**, UDA kept full activity against this N234Q + N709Q mutant VLP. Finally, the N657  
448 glycosylation site (in S1) was targeted, given that of the remaining glycosylation sites this glycan is  
449 positioned most closely to the stem of the S2 subunit (**Figure 6**). Also, for this N657Q mutant a clear  
450 antiviral effect on pseudovirus transduction was observed (**Table 2**). Thus, removal of the selected N-  
451 glycosylation sites of the spike protein had little impact on the antiviral effect of UDA.



## 452 4 Discussion

453 Despite valuable progression in treatment and prevention of severe COVID-19, the persistent spread  
454 and rapid evolution of SARS-CoV-2 continue to give rise to new VOCs. Furthermore, genetic  
455 recombination of SARS-CoV-2 variants during co-infection could potentially further increase  
456 virulence, transmissibility and morbidity, especially in higher-risk individuals and  
457 immunocompromised patients (42, 43). In addition, the latest circulating SARS-CoV-2 VOCs, i.e.,  
458 Delta and Omicron, have shown increasing resistance to SARS-CoV-2 RBD-specific neutralizing  
459 antibodies and current vaccines (44-46). Therefore, there is an urgent need for antiviral agents with  
460 potent anti-coronavirus activity and broad applicability. In this study, we evaluated the antiviral  
461 potential of UDA against SARS-CoV-2. From the data obtained with pseudotyped virus and live virus  
462 in different cell culture systems, we can conclude that UDA consistently inhibits entry of the virus into  
463 target cells. Our observation that UDA maintained antiviral activity among different SARS-CoV-2  
464 VOCs suggests that UDA should be considered as an antiviral with an interesting pan-character that  
465 could serve as a valuable weapon in the combat against new emerging SARS-CoV-2 variants.

466 We could clearly demonstrate a profound inhibitory effect of UDA on SARS-CoV-2 spike-mediated  
467 fusion, as visualized with real-time microscopy. Targeting the first step in the viral life cycle, i.e., the  
468 engagement of host cell receptors and subsequent viral uptake, is an appealing antiviral strategy for  
469 several reasons. First, some entry mechanisms are widely conserved, even over different virus families.  
470 Second, entry inhibitors are not required to enter the cell because they interact with either a viral or a  
471 cell surface factor. This improves target accessibility and loosens restrictions in structural and chemical  
472 requirements, thereby allowing peptides and antibodies to be considered as drug candidates as well.  
473 Especially in the context of respiratory infections, nasal sprays can then be considered as an additional  
474 treatment option. Third, as blocking viral entry can prevent triggering the inflammatory cascade and  
475 avoid severe damage caused by the virus during a later stage in its life cycle, an entry inhibitor might  
476 improve disease outcome. Finally, entry inhibitors can potentially be used as both therapeutic and  
477 prophylactic drugs. The latter is especially interesting for healthcare workers and people traveling to  
478 endemic countries.

479 Previous work by Keyaerts *et al.* (29) already demonstrated a strong antiviral activity of UDA against  
480 SARS-CoV, most probably by hindering viral attachment. Plant lectins have also been shown to not  
481 only interfere with virus attachment for HIV (47), but also block virus-cell fusion for both HIV and  
482 influenza (25, 26, 48). Given that the basic principle for membrane fusion (e.g., heptad repeat domains

483 and fusion peptide) in the fusion protein is conserved among different enveloped viruses, one can  
484 speculate that lectins, such as UDA, by interacting with glycans on the fusion protein might generally  
485 hamper the flexibility of the fusion protein to execute the fusion process. Our cell-cell fusion  
486 experiments clearly indicated that a saturating amount of UDA is required during the dynamic fusion  
487 process in order to evoke a (nearly) complete inhibitory effect. We observed that removal of unbound  
488 UDA before the initiation of cell-cell fusion resulted in a significant drop in the inhibition potential of  
489 UDA. This can either be because of a transient interaction of UDA with the S protein, which is not  
490 lasting long enough to prevent further fusion steps, or because UDA is acting at a specific step post  
491 receptor attachment by S, when a complete conformational change in the spike protein is taking place  
492 to execute the final steps in membrane fusion (e.g., detachment of S1 from S2, and the insertion of the  
493 fusion peptide in the host cell membrane with subsequent formation of the 6-helix bundle).

494 Via molecular docking it has been proposed that UDA specifically interacts with N-linked glycans on  
495 the RBD (49). However, our SPR data indicate that UDA is not directly interfering with binding of the  
496 RBD to ACE2, arguing for a post-attachment effect of UDA. Nevertheless, we cannot fully exclude an  
497 impact on spike attachment to ACE2, as in native trimeric spikes the ACE2 receptor-binding site is  
498 only exposed when the RBD is in the “up” conformation (50). Previous studies demonstrated that spike  
499 glycans, linked to N165, N234 (located outside the RBD) and N343 (located in the RBD), can modulate  
500 the RBD conformation. Removal of these glycosylation sites leads to a significant reduction of ACE2  
501 binding, as the RBD will undergo a conformational shift towards the “down” state (51, 52). Thus, if  
502 UDA would target one of these glycans, which are located in or adjacent to the RBD, this could  
503 potentially alter the RBD conformation and therefore reduce the attachment efficiency of the virus to  
504 host cells. While substitutions N234Q and N657Q did not alter UDA activity, we did not assess the  
505 role of other S1 glycans in UDA binding yet. Alternatively, UDA could also interfere with viral entry  
506 by blocking binding to auxiliary receptors or cofactors, or by hampering protease cleavage at the S2'  
507 site. More detailed analysis of the interaction of UDA on SARS-CoV-2 spike is needed to further  
508 elucidate its specific mode of action.

509 Containing 22 N-linked glycosylations on its surface, either complex type or oligomannose type  
510 glycans (40, 53, 54), SARS-CoV-2 spike presents multiple potential target sites for UDA interaction.  
511 Also, as UDA is one of the smallest plant lectins reported (21), it is not unlikely that multiple UDA  
512 molecules may simultaneously interact with the spike protein. Our initial glycosylation scan of the S2  
513 subunit clearly shows that UDA activity is not related to a single N-glycosylation in the S2 subunit, as

514 the removal of up to 3 glycosylation sites in S2 does not impact the antiviral activity of UDA. However,  
515 it is highly plausible that even more glycosylation sites on the spike protein need to be deleted before  
516 significant resistance against UDA could occur, as has been reported for HIV (55). Such mutant virus  
517 strains with a depleted glycan shield would become increasingly vulnerable to neutralising antibodies  
518 and the cellular immune system. In addition, loss of glycosylation has an impact on protein stability  
519 and functionality, and may render these escape mutants less infectious. This would suggest a high  
520 resistance barrier for UDA.

521 Taken together, our results demonstrate that UDA is a highly promising candidate for development as  
522 a potent and broadly acting antiviral agent against current and future SARS-CoV-2 variants.

523 **5 Conflict of Interest**

524 *The authors declare that the research was conducted in the absence of any commercial or financial*  
525 *relationships that could be construed as a potential conflict of interest.*

526 **6 Author Contributions**

527 K.V., E.V., J.S. and S.N. conceived experiments; E.V., T.D., B.P., J.S., A.C. and S.N. performed  
528 experiments; K.V., E.V., J.S., S.N. and A.S. wrote the manuscript; D.S. secured funding; P.M. and  
529 D.S. provided reagents; E.V.D., P.M. and A.S. provided expertise and feedback.

530 **7 Funding**

531 A. Stevaert acknowledges funding from Fundació La Marató de TV3, Spain (Project No. 201832-30).

532 **8 Acknowledgments**

533 We thank Geert Schoofs and Eef Meyen for their excellent technical assistance. Images were created  
534 with UCSF Chimera, developed by the Resource for Biocomputing, Visualization, and Informatics at  
535 the University of California, San Francisco, with support from NIH P41-GM103311; Graphpad Prism  
536 9.3.1 (GraphPad Software, San Diego, California USA) and BioRender.com.

537 **9 Supplementary Material**

538 Supplementary Figures 1 – 5 and Supplementary Movie.

## 539 **Figure Legends**

540 **Figure 1.** Antiviral activity of UDA against pseudotyped SARS-CoV-2. VLPs expressing the Wuhan-  
541 Hu-1 spike and a GFP or luciferase reporter was used to transduce cells in the absence (untreated  
542 control) or presence of UDA (as indicated). (A) A549.ACE2<sup>+</sup> cells were transiently transfected with  
543 TMPRSS2 and subsequently exposed to pseudotyped SARS-CoV-2 expressing GFP. Panel shows  
544 representative images taken at 3 days post-transduction. (B) GFP-positive cells were quantified from  
545 images of (A). Graph represents a concentration-response of UDA (mean  $\pm$  SD from 3 independent  
546 experiments). (C) UDA was tested against luciferase-based pseudotyped SARS-CoV-2 in  
547 commercially available A549.ACE2<sup>+</sup>.TMPRSS2<sup>+</sup> cells. Luciferase activity was measured at 22h after  
548 VLP transduction. Graph represents a concentration-response of UDA from 3 biological replicates in  
549 quadruple (mean  $\pm$  SD; n=12).

550 **Figure 2.** Antiviral activity of UDA against live SARS-CoV-2 virus in Vero E6 and U87.ACE2<sup>+</sup> cells.  
551 Cells were exposed to clinical isolates of SARS-CoV-2, i.e., variants Wuhan-Hu-1 (A), 20A.EU2 (B),  
552 Gamma (C) or GFP-expressing Wuhan-Hu-1 (D) in the absence or presence of UDA. (A and B) SARS-  
553 CoV-2 replication was assessed by RT-qPCR analysis of the viral copy numbers of the N gene in the  
554 supernatant at day 3 post infection (p.i.). RT-qPCR data were used to calculate the % inhibition of viral  
555 replication and to plot a concentration-response curve for UDA. Graphs show data of 3 independent  
556 experiments with 2 technical replicates each (mean  $\pm$  SD; n=6). (C) Cells were collected at 40h p.i.  
557 and stained intracellularly for the viral N protein. Histogram plots show mean fluorescence intensity  
558 (MFI) values of N expression in noninfected (Cell Control; grey), infected (Virus Control; blue) and  
559 UDA-treated infected (red) Vero E6 cells from a representative experiment. Single cell analysis was  
560 performed on 8,000 – 10,000 cells by flow cytometry. The numbers in each plot refer to the percentage  
561 of cells that stained positive for N (i.e., infected cells). The dashed grey histogram plot represents the  
562 background signal from the non-infected cell control. (D) Pictures, taken at 2 days post infection, show  
563 GFP expression in the infected U87.ACE2<sup>+</sup> cells. Representative pictures from a biological replicate  
564 out of two are shown. The values between brackets refer to the percentage GFP<sup>+</sup> area (relative to the  
565 virus control); mean  $\pm$  SD (n=2).

566 **Figure 3.** Antiviral activity of UDA against live SARS-CoV-2 virus in A549 cells and primary ALI  
567 cultures. (A-B) A549.ACE2<sup>+</sup>.TMPRSS2 cells were exposed to SARS-CoV-2 (WT Wuhan-Hu-1) in  
568 the absence or presence of UDA. (A) SARS-CoV-2 replication was assessed by flow cytometry. Cells  
569 infected with SAR-CoV-2 in the absence or presence of UDA (2  $\mu$ M) were collected at 48h p.i. and  
570 stained intracellularly for the viral N protein. Histogram plots show mean fluorescence intensity (MFI)  
571 values of N expression in noninfected (Cell Control; grey), infected (Virus Control; blue) and UDA-  
572 treated infected (red) cells from a representative experiment. Single cell analysis was performed on  
573 8,000 – 10,000 cells by flow cytometry. The numbers in each plot refer to the percentage of cells that  
574 stained positive for N (i.e., infected cells). The dashed grey histogram plot represents the background  
575 signal from the non-infected cell control. (B) SARS-CoV-2 replication was assessed by RT-qPCR  
576 analysis of the viral copy numbers of the N gene in the supernatant at day 3 post infection (p.i.). RT-  
577 qPCR data were used to calculate the % inhibition of viral replication and to plot a concentration-  
578 response curve for UDA. Graphs show data of 3 independent experiments with 2 technical replicates  
579 each (mean  $\pm$  SD; n=6). (C) Human primary lower (SmallAir) airway epithelial ALI cultures were  
580 infected apically with a GFP-expressing SARS-CoV-2 variant (Wuhan-Hu-1) for 2h in the absence or  
581 presence of UDA, washed and exposed to air. Pictures, taken at 4 days post infection, show GFP  
582 expression in the infected cells. Representative pictures from a biological replicate out of two are  
583 shown.

584 **Figure 4.** Surface plasmon resonance (SPR) analysis of UDA. (A) SPR sensorgram showing the  
585 binding kinetics for UDA and immobilized monomeric Wuhan-Hu-1 spike protein (1:2 dilutions of  
586 UDA, starting from 100 nM). Data are shown as black lines, and the best fit of the data to a 1:1 binding  
587 model is shown in red. (B) SPR sensorgram showing the binding kinetics for UDA and immobilized  
588 RBD of Wuhan-Hu-1 spike protein (1:2 dilutions of UDA, starting from 200 nM), with a fast off rate.  
589 Data are shown as black lines, and the best fit of the data to a 1:1 binding model is shown in red. (C)  
590 Biotinylated ACE2 was coupled as ligand to a CAP sensor chip. Graph shows sensorgrams for the  
591 binding of different analytes to ACE2. Green curve: RBD (50 nM) only; red curve: RBD (50 nM) +  
592 UDA (1  $\mu$ M); grey curve: RBD (50 nM) + non-neutralising spike-binding antibody R007 (50 nM);  
593 blue curve: RBD (50 nM) + spike-neutralising antibody R001 (50 nM); orange curve: UDA (1  $\mu$ M)  
594 only. Note that RBD in complex with R007 can still bind to ACE2 resulting in a stronger resonance  
595 signal induced by the large protein complex. See Supplementary Figure 3A for kinetics values.

596 **Figure 5.** UDA prevents cell-cell fusion of A549.ACE2<sup>+</sup> cells with spike-expressing HEK293T cells.  
597 A549.ACE2<sup>+</sup> cells (transfected to express the first 10 betasheets of neogreen) were overlaid with  
598 HEK293T cells co-transfected with a plasmid encoding the SARS-CoV-2 spike protein and a plasmid  
599 encoding the 11<sup>th</sup> betasheet of neogreen. Overlay was done in the absence (untreated control) or  
600 presence of UDA. Representative pictures of cell-cell fusion were taken 12h after the co-cultivation of  
601 both cell types. Top row ('no pretreatment'): compound was added at the same moment as cell overlay;  
602 Second row ('HEK293T pretreated; wash'): HEK293T were pretreated with UDA for 30 min;  
603 extensively washed and added to the A549 cells without compound; Third row ('HEK293T  
604 pretreated'): HEK293T were pretreated with UDA for 30 min and added to the A549 cells with  
605 compound; Fourth row ('A549.ACE2<sup>+</sup> pretreated; wash'): A549 cells were pretreated with UDA for  
606 30 min; extensively washed before the HEK293T cells were added without compound; Fifth row  
607 ('A549.ACE2<sup>+</sup> pretreated'): A549 cells were pretreated with UDA for 30 min before HEK293T cells  
608 were added without removal of compound; Bottom row ('HEK293T non-transfected'): as a negative  
609 control HEK293T cells were transfected with only the 11<sup>th</sup> betasheet of neogreen (without spike  
610 protein) and were added to the A549.ACE2<sup>+</sup> cells (transfected with the first 10 betasheets of  
611 neogreen). For each condition, 2 replicate wells were analysed and in each well 4 different areas of  
612 the cell culture were monitored using an Incucyte live-cell analysis instrument. Representative pictures  
613 are shown. Neogreen expression analysis of the pictures is summarized in Supplementary Figure S3.

614 **Figure 6.** Structure of the SARS-CoV-2 spike trimer, based on PDB 6ZGE (56). One monomer is  
615 coloured, in blue (S1 subunit; with RBD in darker blue) and dark cyan (S2 subunit), with the N-  
616 glycosylation sites in orange. The stars indicate the N-glycosylation sites which were deleted in this  
617 study. Four N-glycosylation sites (i.e., N74, N1158, N1173 and N1194) were unresolved in the cryoEM  
618 structure. Image created with UCSF Chimera (57).

## 619 References

- 620 1. Huang C, Wang Y, Li X, Ren L, Zhao J, Hu Y, et al. Clinical features of patients infected with  
621 2019 novel coronavirus in Wuhan, China. *The Lancet*. (2020) 395:497-506. doi: 10.1016/s0140-  
622 6736(20)30183-5
- 623 2. Wang H, Paulson KR, Pease SA, Watson S, Comfort H, Zheng P, et al. Estimating excess  
624 mortality due to the COVID-19 pandemic: a systematic analysis of COVID-19-related mortality, 2020–  
625 21. *The Lancet*. (2022) 399:1513-36. doi: 10.1016/s0140-6736(21)02796-3
- 626 3. Subissi L, von Gottberg A, Thukral L, Worp N, Oude Munnink BB, Rathore S, et al. An early  
627 warning system for emerging SARS-CoV-2 variants. *Nat Med*. (2022). doi: 10.1038/s41591-022-  
628 01836-w
- 629 4. Beigel JH. What is the role of remdesivir in patients with COVID-19? *Curr Opin Crit Care*.  
630 (2021) 27:487-92. doi: 10.1097/MCC.0000000000000866
- 631 5. Owen DR, Allerton CMN, Anderson AS, Aschenbrenner L, Avery M, Berritt S, et al. An oral  
632 SARS-CoV-2 M(pro) inhibitor clinical candidate for the treatment of COVID-19. *Science*. (2021)  
633 374:1586-93. doi: 10.1126/science.abl4784
- 634 6. Jayk Bernal A, Gomes da Silva MM, Musungaie DB, Kovalchuk E, Gonzalez A, Delos Reyes  
635 V, et al. Molnupiravir for Oral Treatment of Covid-19 in Nonhospitalized Patients. *N Engl J Med*.  
636 (2022) 386:509-20. doi: 10.1056/NEJMoa2116044
- 637 7. Cameroni E, Bowen JE, Rosen LE, Saliba C, Zepeda SK, Culap K, et al. Broadly neutralizing  
638 antibodies overcome SARS-CoV-2 Omicron antigenic shift. *Nature*. (2022) 602:664-70. doi:  
639 10.1038/s41586-021-04386-2
- 640 8. Hoffmann M, Kleine-Weber H, Schroeder S, Kruger N, Herrler T, Erichsen S, et al. SARS-  
641 CoV-2 Cell Entry Depends on ACE2 and TMPRSS2 and Is Blocked by a Clinically Proven Protease  
642 Inhibitor. *Cell*. (2020) 181:271-80 e8. doi: 10.1016/j.cell.2020.02.052
- 643 9. Koch J, Uckelely ZM, Doldan P, Stanifer M, Boulant S, Lozach PY. TMPRSS2 expression  
644 dictates the entry route used by SARS-CoV-2 to infect host cells. *EMBO J*. (2021) 40:e107821. doi:  
645 10.15252/embj.2021107821
- 646 10. Meng B, Abdullahi A, Ferreira I, Goonawardane N, Saito A, Kimura I, et al. Altered TMPRSS2  
647 usage by SARS-CoV-2 Omicron impacts tropism and fusogenicity. *Nature*. (2022). doi:  
648 10.1038/s41586-022-04474-x
- 649 11. Zhao H, Lu L, Peng Z, Chen LL, Meng X, Zhang C, et al. SARS-CoV-2 Omicron variant shows  
650 less efficient replication and fusion activity when compared with delta variant in TMPRSS2-expressed  
651 cells. *Emerg Microbes Infect*. (2021):1-18. doi: 10.1080/22221751.2021.2023329
- 652 12. Tian W, Li D, Zhang N, Bai G, Yuan K, Xiao H, et al. O-glycosylation pattern of the SARS-  
653 CoV-2 spike protein reveals an "O-Follow-N" rule. *Cell Res*. (2021) 31:1123-5. doi: 10.1038/s41422-  
654 021-00545-2
- 655 13. Grant OC, Montgomery D, Ito K, Woods RJ. Analysis of the SARS-CoV-2 spike protein glycan  
656 shield reveals implications for immune recognition. *Scientific reports*. (2020) 10:14991. doi:  
657 10.1038/s41598-020-71748-7
- 658 14. Li Q, Wu J, Nie J, Zhang L, Hao H, Liu S, et al. The Impact of Mutations in SARS-CoV-2  
659 Spike on Viral Infectivity and Antigenicity. *Cell*. (2020) 182:1284-94 e9. doi:  
660 10.1016/j.cell.2020.07.012

- 661 15. Zhao P, Praissman JL, Grant OC, Cai Y, Xiao T, Rosenbalm KE, et al. Virus-Receptor  
662 Interactions of Glycosylated SARS-CoV-2 Spike and Human ACE2 Receptor. *Cell Host Microbe*.  
663 (2020) 28:586-601 e6. doi: 10.1016/j.chom.2020.08.004
- 664 16. Yang Q, Hughes TA, Kelkar A, Yu X, Cheng K, Park S, et al. Inhibition of SARS-CoV-2 viral  
665 entry upon blocking N- and O-glycan elaboration. *Elife*. (2020) 9. doi: 10.7554/eLife.61552
- 666 17. Zhang L, Mann M, Syed ZA, Reynolds HM, Tian E, Samara NL, et al. Furin cleavage of the  
667 SARS-CoV-2 spike is modulated by O-glycosylation. *Proc Natl Acad Sci U S A*. (2021) 118. doi:  
668 10.1073/pnas.2109905118
- 669 18. Francois KO, Balzarini J. Potential of carbohydrate-binding agents as therapeutics against  
670 enveloped viruses. *Med Res Rev*. (2012) 32:349-87. doi: 10.1002/med.20216
- 671 19. Shibuya N, Goldstein IJ, Shafer JA, Peumans WJ, Broekaert WF. Carbohydrate binding  
672 properties of the stinging nettle (*Urtica dioica*) rhizome lectin. *Arch Biochem Biophys*. (1986) 249:215-  
673 24. doi: 10.1016/0003-9861(86)90577-1
- 674 20. Beintema JJ, Peumans WJ. The primary structure of stinging nettle (*Urtica dioica*) agglutinin.  
675 A two-domain member of the hevein family. *FEBS Lett*. (1992) 299:131-4. doi: 10.1016/0014-  
676 5793(92)80231-5
- 677 21. Peumans WJ, Deley M, Broekaert WF. An Unusual Lectin from Stinging Nettle (*Urtica-Dioica*)  
678 Rhizomes. *Febs Letters*. (1984) 177:99-103. doi: Doi 10.1016/0014-5793(84)80989-8
- 679 22. Saul FA, Rovira P, Boulot G, Damme EJ, Peumans WJ, Truffa-Bachi P, et al. Crystal structure  
680 of *Urtica dioica* agglutinin, a superantigen presented by MHC molecules of class I and class II.  
681 *Structure*. (2000) 8:593-603. doi: 10.1016/s0969-2126(00)00142-8
- 682 23. Gordts SC, Renders M, Ferir G, Huskens D, Van Damme EJ, Peumans W, et al. NICTABA  
683 and UDA, two GlcNAc-binding lectins with unique antiviral activity profiles. *J Antimicrob Chemother*.  
684 (2015) 70:1674-85. doi: 10.1093/jac/dkv034
- 685 24. Itakura Y, Nakamura-Tsuruta S, Kominami J, Tateno H, Hirabayashi J. Sugar-Binding Profiles  
686 of Chitin-Binding Lectins from the Hevein Family: A Comprehensive Study. *Int J Mol Sci*. (2017) 18.  
687 doi: 10.3390/ijms18061160
- 688 25. Balzarini J, Neyts J, Schols D, Hosoya M, Van Damme E, Peumans W, et al. The mannose-  
689 specific plant lectins from *Cymbidium* hybrid and *Epipactis helleborine* and the (N-  
690 acetylglucosamine)n-specific plant lectin from *Urtica dioica* are potent and selective inhibitors of  
691 human immunodeficiency virus and cytomegalovirus replication in vitro. *Antiviral Res*. (1992) 18:191-  
692 207. doi: 10.1016/0166-3542(92)90038-7
- 693 26. Vanderlinden E, Van Winkel N, Naesens L, Van Damme EJM, Persoons L, Schols D. In Vitro  
694 Characterization of the Carbohydrate-Binding Agents HHA, GNA, and UDA as Inhibitors of Influenza  
695 A and B Virus Replication. *Antimicrob Agents Chemother*. (2021) 65. doi: 10.1128/AAC.01732-20
- 696 27. Bertaux C, Daelemans D, Meertens L, Cormier EG, Reinus JF, Peumans WJ, et al. Entry of  
697 hepatitis C virus and human immunodeficiency virus is selectively inhibited by carbohydrate-binding  
698 agents but not by polyanions. *Virology*. (2007) 366:40-50. doi: 10.1016/j.virol.2007.04.008
- 699 28. Alen MM, De Burghgraeve T, Kaptein SJ, Balzarini J, Neyts J, Schols D. Broad antiviral  
700 activity of carbohydrate-binding agents against the four serotypes of dengue virus in monocyte-derived  
701 dendritic cells. *PLoS One*. (2011) 6:e21658. doi: 10.1371/journal.pone.0021658



- 702 29. Keyaerts E, Vijgen L, Pannecouque C, Van Damme E, Peumans W, Egberink H, et al. Plant  
703 lectins are potent inhibitors of coronaviruses by interfering with two targets in the viral replication  
704 cycle. *Antiviral Res.* (2007) 75:179-87. doi: 10.1016/j.antiviral.2007.03.003
- 705 30. Vanhulle E, Stroobants J, Provinciael B, Camps A, Noppen S, Maes P, et al. SARS-CoV-2  
706 Permissive glioblastoma cell line for high throughput antiviral screening. *Antiviral Res.* (2022)  
707 203:105342. doi: 10.1016/j.antiviral.2022.105342
- 708 31. Vanhulle E, Provinciael B, Stroobants J, Camps A, Maes P, Vermeire K. Intracellular flow  
709 cytometry complements RT-qPCR detection of circulating SARS-CoV-2 variants of concern.  
710 *BioTechniques.* (2022) 72:1-10. doi: 10.2144/btn-2022-0018
- 711 32. Thi Nhu Thao T, Labroussaa F, Ebert N, V'Kovski P, Stalder H, Portmann J, et al. Rapid  
712 reconstruction of SARS-CoV-2 using a synthetic genomics platform. *Nature.* (2020) 582:561-5. doi:  
713 10.1038/s41586-020-2294-9
- 714 33. Reed LJ, Muench H. A Simple Method of Estimating Fifty Per Cent Endpoints. *American*  
715 *Journal of Epidemiology.* (1938) 27:493-7. doi: 10.1093/oxfordjournals.aje.a118408
- 716 34. Ou X, Liu Y, Lei X, Li P, Mi D, Ren L, et al. Characterization of spike glycoprotein of SARS-  
717 CoV-2 on virus entry and its immune cross-reactivity with SARS-CoV. *Nat Commun.* (2020) 11:1620.  
718 doi: 10.1038/s41467-020-15562-9
- 719 35. Feng S, Sekine S, Pessino V, Li H, Leonetti MD, Huang B. Improved split fluorescent proteins  
720 for endogenous protein labeling. *Nat Commun.* (2017) 8:370. doi: 10.1038/s41467-017-00494-8
- 721 36. Schindelin J, Arganda-Carreras I, Frise E, Kaynig V, Longair M, Pietzsch T, et al. Fiji: an open-  
722 source platform for biological-image analysis. *Nat Methods.* (2012) 9:676-82. doi:  
723 10.1038/nmeth.2019
- 724 37. Wrapp D, Wang N, Corbett KS, Goldsmith JA, Hsieh CL, Abiona O, et al. Cryo-EM structure  
725 of the 2019-nCoV spike in the prefusion conformation. *Science.* (2020) 367:1260-3. doi:  
726 10.1126/science.abb2507
- 727 38. Shajahan A, Archer-Hartmann S, Supekar NT, Gleinich AS, Heiss C, Azadi P. Comprehensive  
728 characterization of N- and O- glycosylation of SARS-CoV-2 human receptor angiotensin converting  
729 enzyme 2. *Glycobiology.* (2021) 31:410-24. doi: 10.1093/glycob/cwaa101
- 730 39. Shajahan A, Supekar NT, Gleinich AS, Azadi P. Deducing the N- and O-glycosylation profile  
731 of the spike protein of novel coronavirus SARS-CoV-2. *Glycobiology.* (2020) 30:981-8. doi:  
732 10.1093/glycob/cwaa042
- 733 40. Watanabe Y, Allen JD, Wrapp D, McLellan JS, Crispin M. Site-specific glycan analysis of the  
734 SARS-CoV-2 spike. *Science.* (2020) 369:330-3. doi: 10.1126/science.abb9983
- 735 41. Hoffmann D, Mereiter S, Jin Oh Y, Monteil V, Elder E, Zhu R, et al. Identification of lectin  
736 receptors for conserved SARS-CoV-2 glycosylation sites. *EMBO J.* (2021) 40:e108375. doi:  
737 10.15252/embj.2021108375
- 738 42. Wawina-Bokalanga T, Logist AS, Sinnesael R, Van Holm B, Delforge ML, Struyven P, et al.  
739 Genomic evidence of co-identification with Omicron and Delta SARS-CoV-2 variants: a report of two  
740 cases. *Int J Infect Dis.* (2022) 122:212-4. doi: 10.1016/j.ijid.2022.05.043
- 741 43. Ignatieva A, Hein J, Jenkins PA. Ongoing Recombination in SARS-CoV-2 Revealed through  
742 Genealogical Reconstruction. *Mol Biol Evol.* (2022) 39. doi: 10.1093/molbev/msac028

- 743 44. Planas D, Saunders N, Maes P, Guivel-Benhassine F, Planchais C, Buchrieser J, et al.  
744 Considerable escape of SARS-CoV-2 Omicron to antibody neutralization. *Nature*. (2022) 602:671-5.  
745 doi: 10.1038/s41586-021-04389-z
- 746 45. Takashita E, Kinoshita N, Yamayoshi S, Sakai-Tagawa Y, Fujisaki S, Ito M, et al. Efficacy of  
747 Antiviral Agents against the SARS-CoV-2 Omicron Subvariant BA.2. *N Engl J Med*. (2022) 386:1475-  
748 7. doi: 10.1056/NEJMc2201933
- 749 46. Cao Y, Yisimayi A, Jian F, Song W, Xiao T, Wang L, et al. BA.2.12.1, BA.4 and BA.5 escape  
750 antibodies elicited by Omicron infection. *Nature*. (2022). doi: 10.1038/s41586-022-04980-y
- 751 47. Muller WE, Renneisen K, Kreuter MH, Schroder HC, Winkler I. The D-mannose-specific  
752 lectin from *Gerardia savaglia* blocks binding of human immunodeficiency virus type I to H9 cells and  
753 human lymphocytes in vitro. *J Acquir Immune Defic Syndr (1988)*. (1988) 1:453-8. doi:
- 754 48. Balzarini J, Schols D, Neyts J, Van Damme E, Peumans W, De Clercq E. Alpha-(1-3)- and  
755 alpha-(1-6)-D-mannose-specific plant lectins are markedly inhibitory to human immunodeficiency  
756 virus and cytomegalovirus infections in vitro. *Antimicrob Agents Chemother*. (1991) 35:410-6. doi:  
757 10.1128/AAC.35.3.410
- 758 49. Lokhande KB, Apte GR, Shrivastava A, Singh A, Pal JK, Swamy KV, et al. Sensing the  
759 interactions between carbohydrate-binding agents and N-linked glycans of SARS-CoV-2 spike  
760 glycoprotein using molecular docking and simulation studies. *J Biomol Struct Dyn*. (2022) 40:3880-  
761 98. doi: 10.1080/07391102.2020.1851303
- 762 50. Yan R, Zhang Y, Li Y, Ye F, Guo Y, Xia L, et al. Structural basis for the different states of the  
763 spike protein of SARS-CoV-2 in complex with ACE2. *Cell Res*. (2021) 31:717-9. doi: 10.1038/s41422-  
764 021-00490-0
- 765 51. Casalino L, Gaieb Z, Goldsmith JA, Hjorth CK, Dommer AC, Harbison AM, et al. Beyond  
766 Shielding: The Roles of Glycans in the SARS-CoV-2 Spike Protein. *ACS Cent Sci*. (2020) 6:1722-34.  
767 doi: 10.1021/acscentsci.0c01056
- 768 52. Sztain T, Ahn SH, Bogetti AT, Casalino L, Goldsmith JA, Seitz E, et al. A glycan gate controls  
769 opening of the SARS-CoV-2 spike protein. *Nat Chem*. (2021) 13:963-8. doi: 10.1038/s41557-021-  
770 00758-3
- 771 53. Watanabe Y, Berndsen ZT, Raghvani J, Seabright GE, Allen JD, Pybus OG, et al.  
772 Vulnerabilities in coronavirus glycan shields despite extensive glycosylation. *Nat Commun*. (2020)  
773 11:2688. doi: 10.1038/s41467-020-16567-0
- 774 54. Woo H, Park SJ, Choi YK, Park T, Tanveer M, Cao Y, et al. Developing a Fully Glycosylated  
775 Full-Length SARS-CoV-2 Spike Protein Model in a Viral Membrane. *J Phys Chem B*. (2020)  
776 124:7128-37. doi: 10.1021/acs.jpcc.0c04553
- 777 55. Balzarini J, Van Laethem K, Hatse S, Froeyen M, Peumans W, Van Damme E, et al.  
778 Carbohydrate-binding agents cause deletions of highly conserved glycosylation sites in HIV GP120: a  
779 new therapeutic concept to hit the achilles heel of HIV. *J Biol Chem*. (2005) 280:41005-14. doi:  
780 10.1074/jbc.M508801200
- 781 56. Wrobel AG, Benton DJ, Xu P, Roustan C, Martin SR, Rosenthal PB, et al. SARS-CoV-2 and  
782 bat RaTG13 spike glycoprotein structures inform on virus evolution and furin-cleavage effects. *Nat*  
783 *Struct Mol Biol*. (2020) 27:763-7. doi: 10.1038/s41594-020-0468-7

784 57. Pettersen EF, Goddard TD, Huang CC, Couch GS, Greenblatt DM, Meng EC, et al. UCSF  
785 Chimera--a visualization system for exploratory research and analysis. *J Comput Chem.* (2004)  
786 25:1605-12. doi: 10.1002/jcc.20084

787

788

**A**

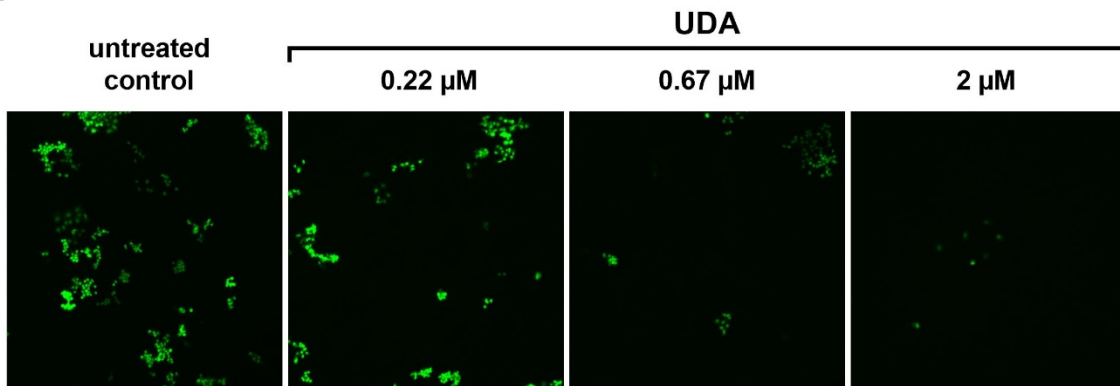

**B**

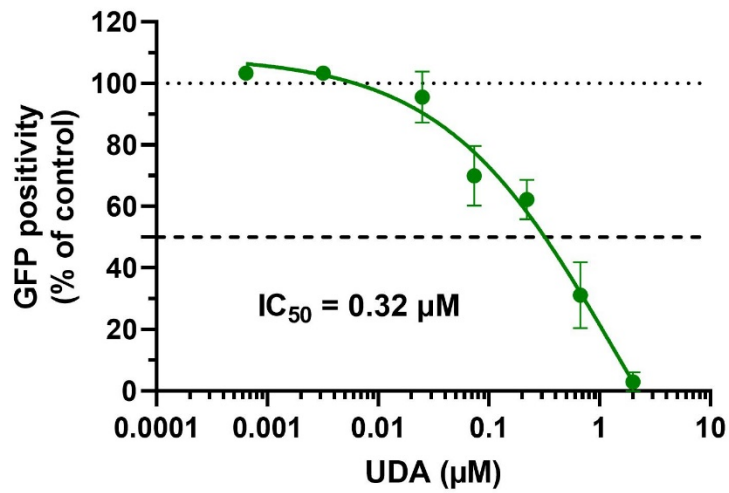

**C**

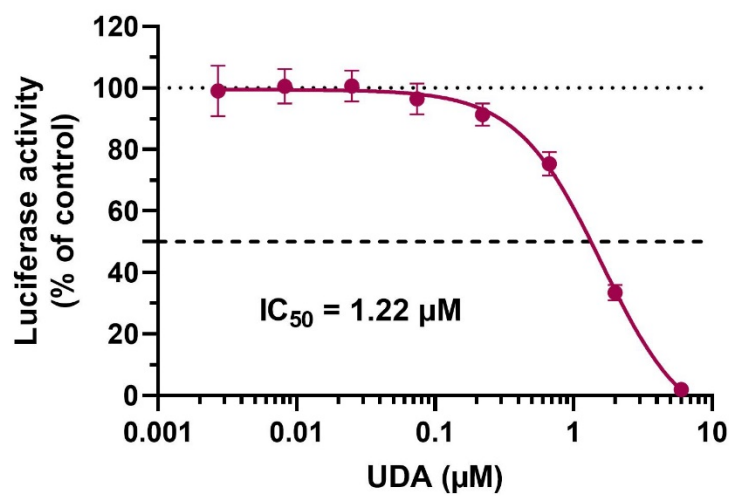

789

790 **Figure 1**

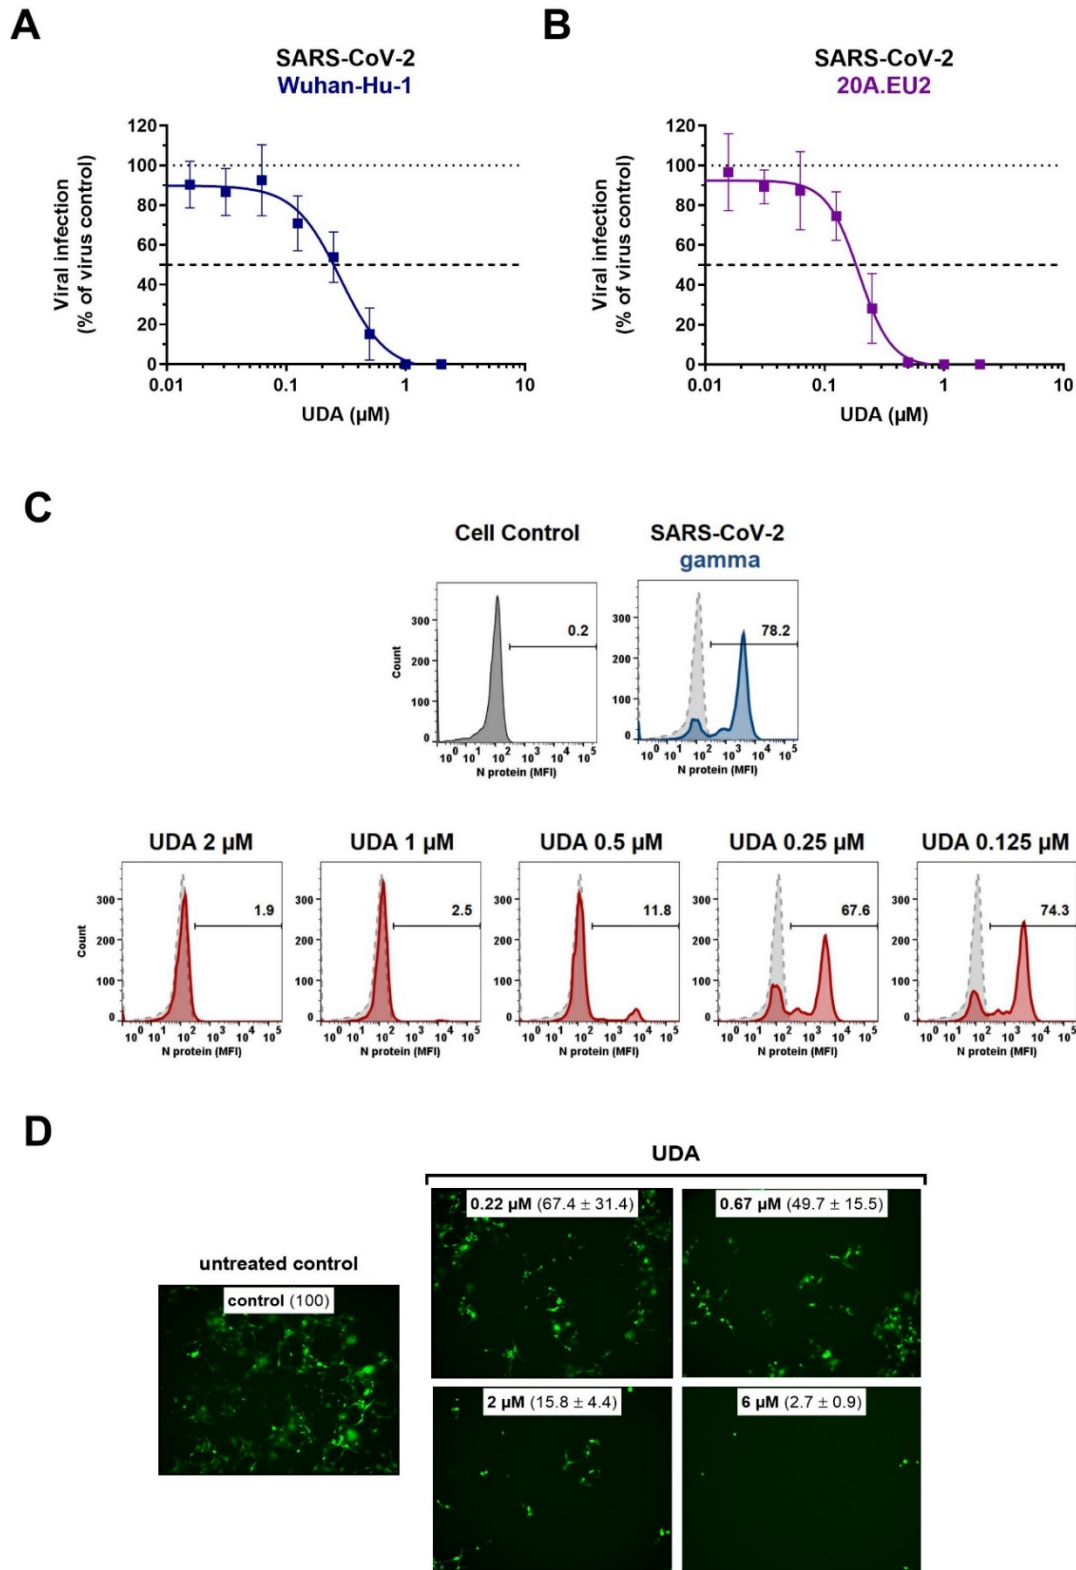

791

792 **Figure 2**

**A**

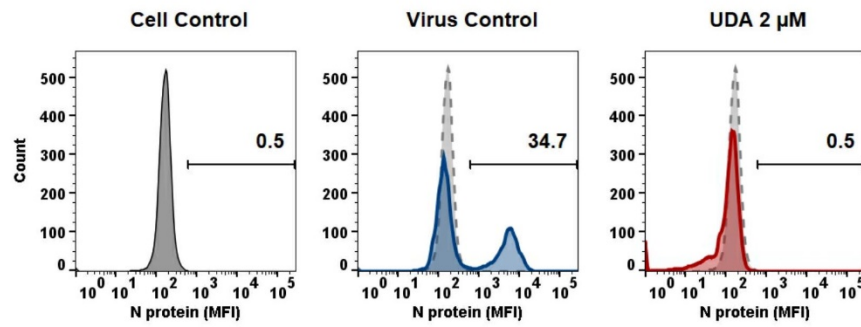

**B**

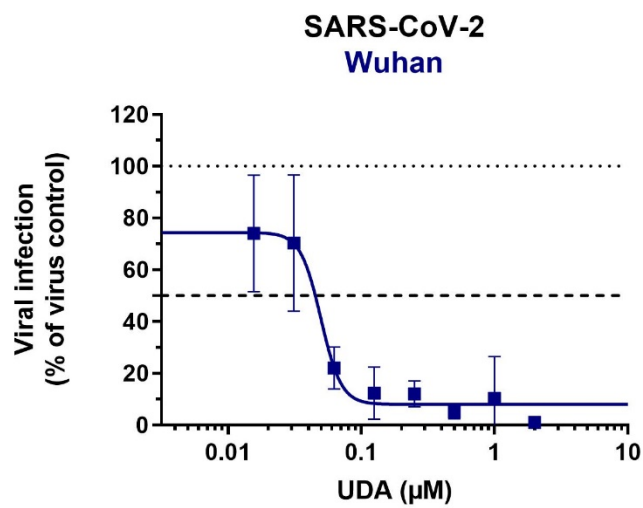

**C**

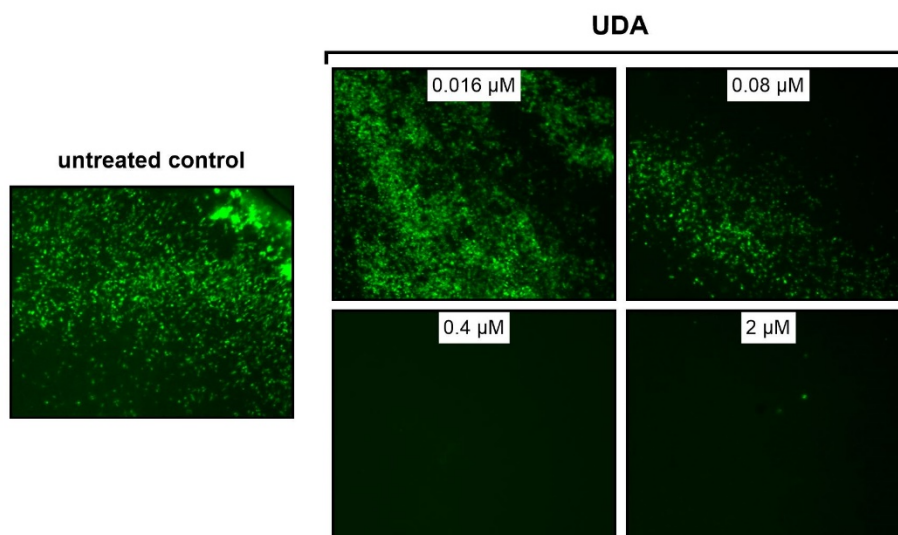

793

794 **Figure 3**

795

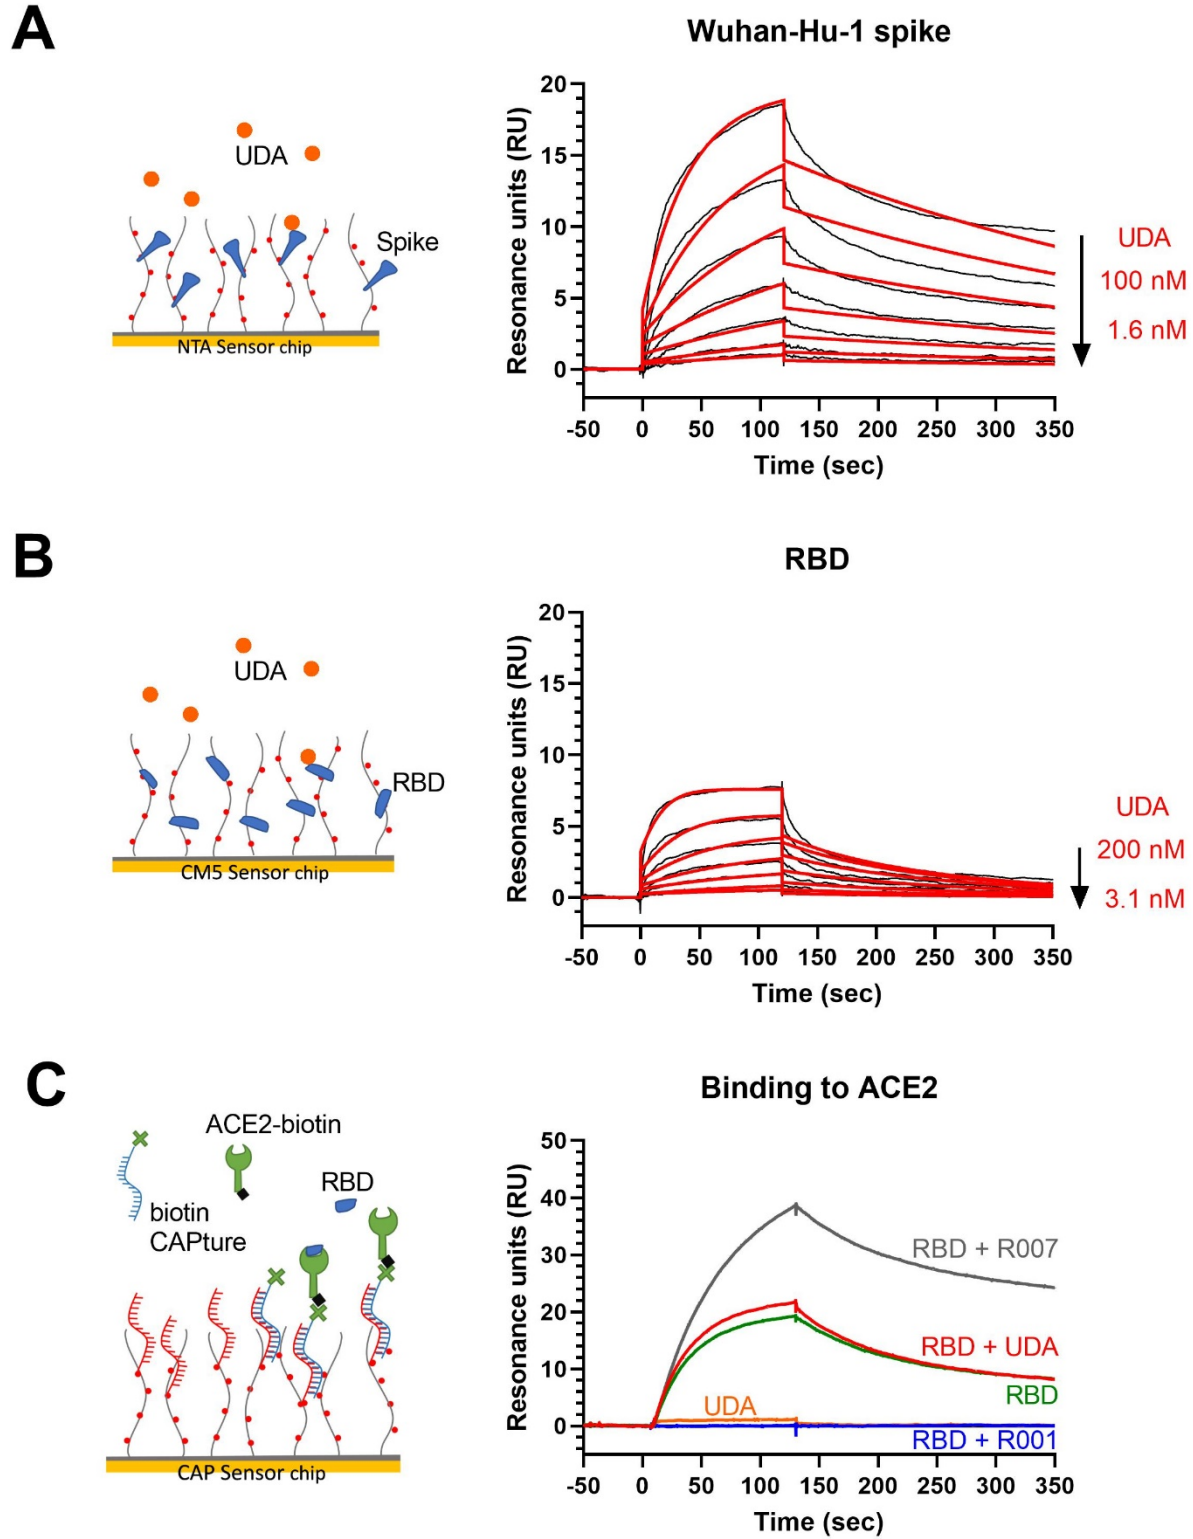

796

797 **Figure 4**

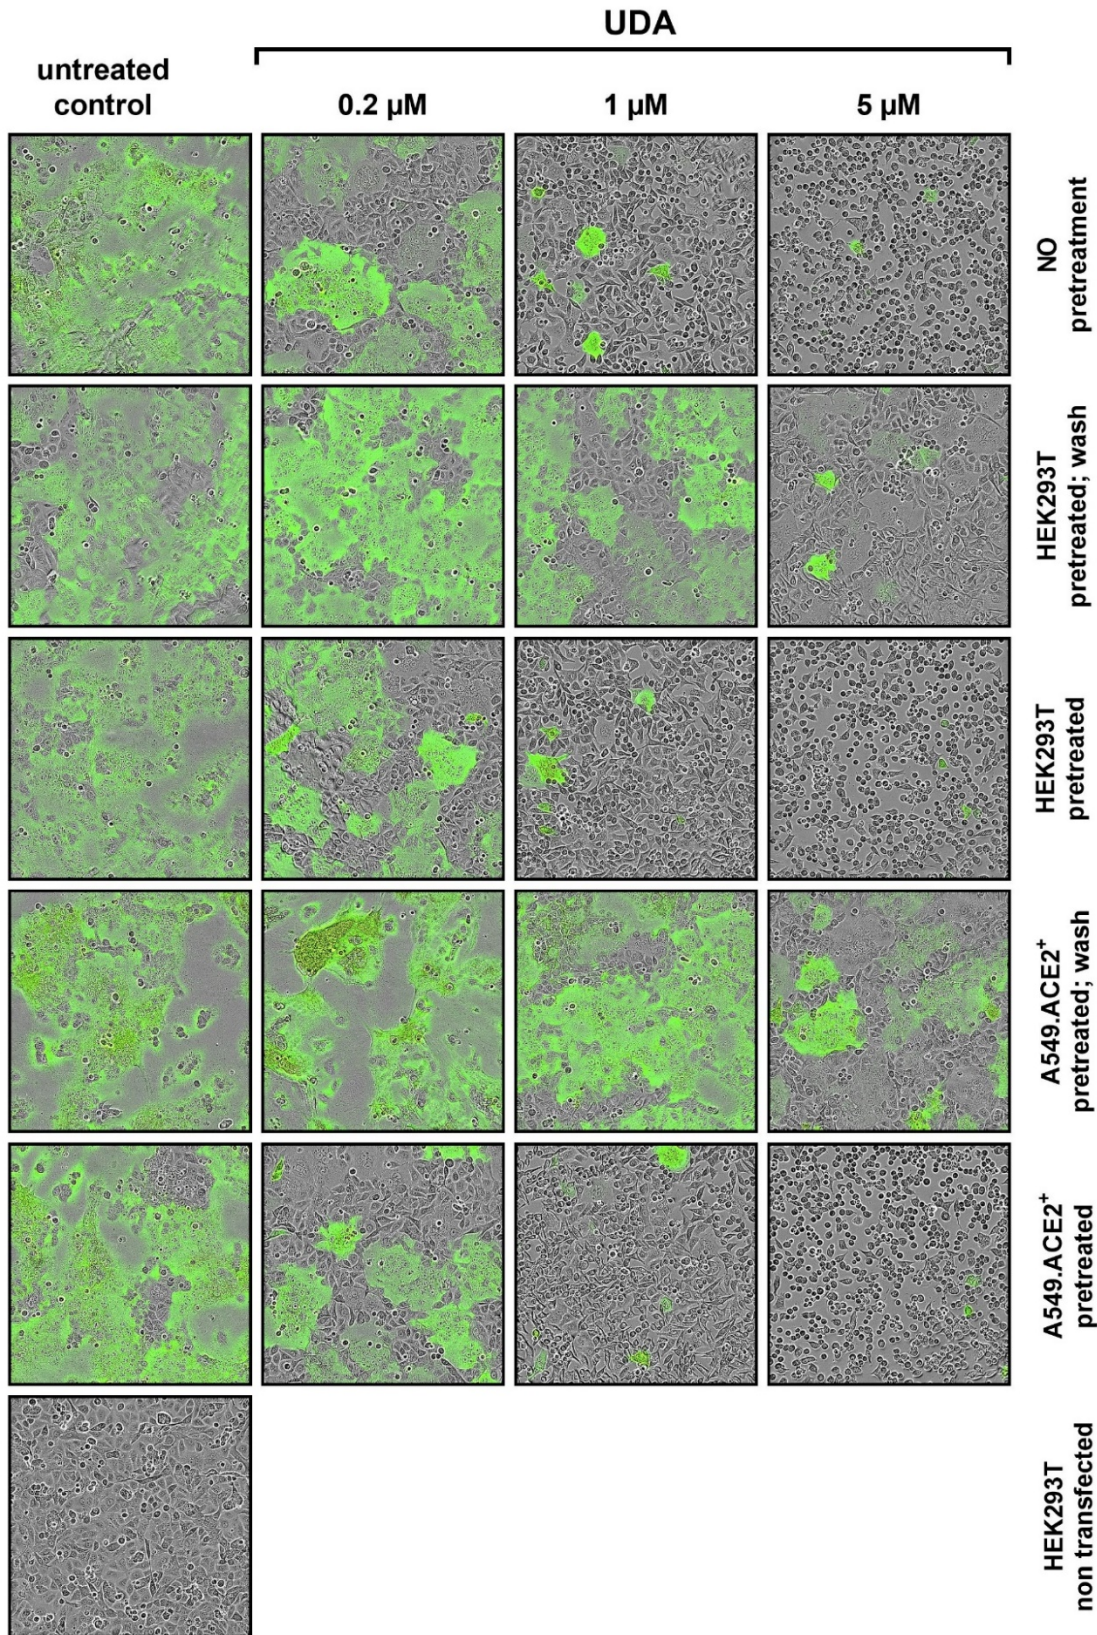

798

799 **Figure 5**



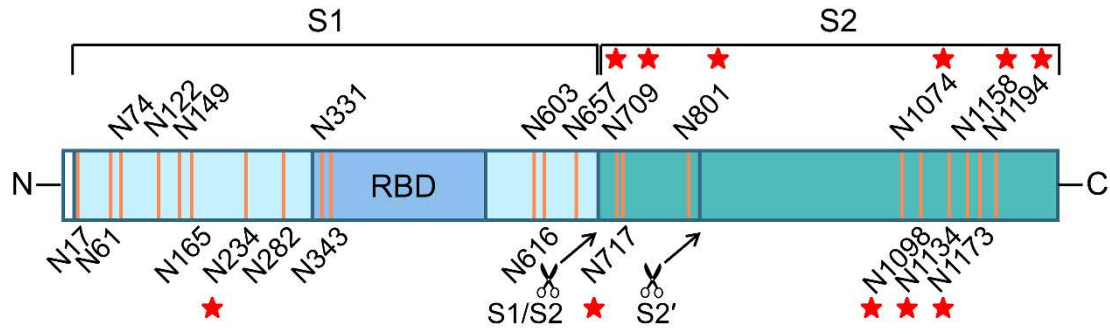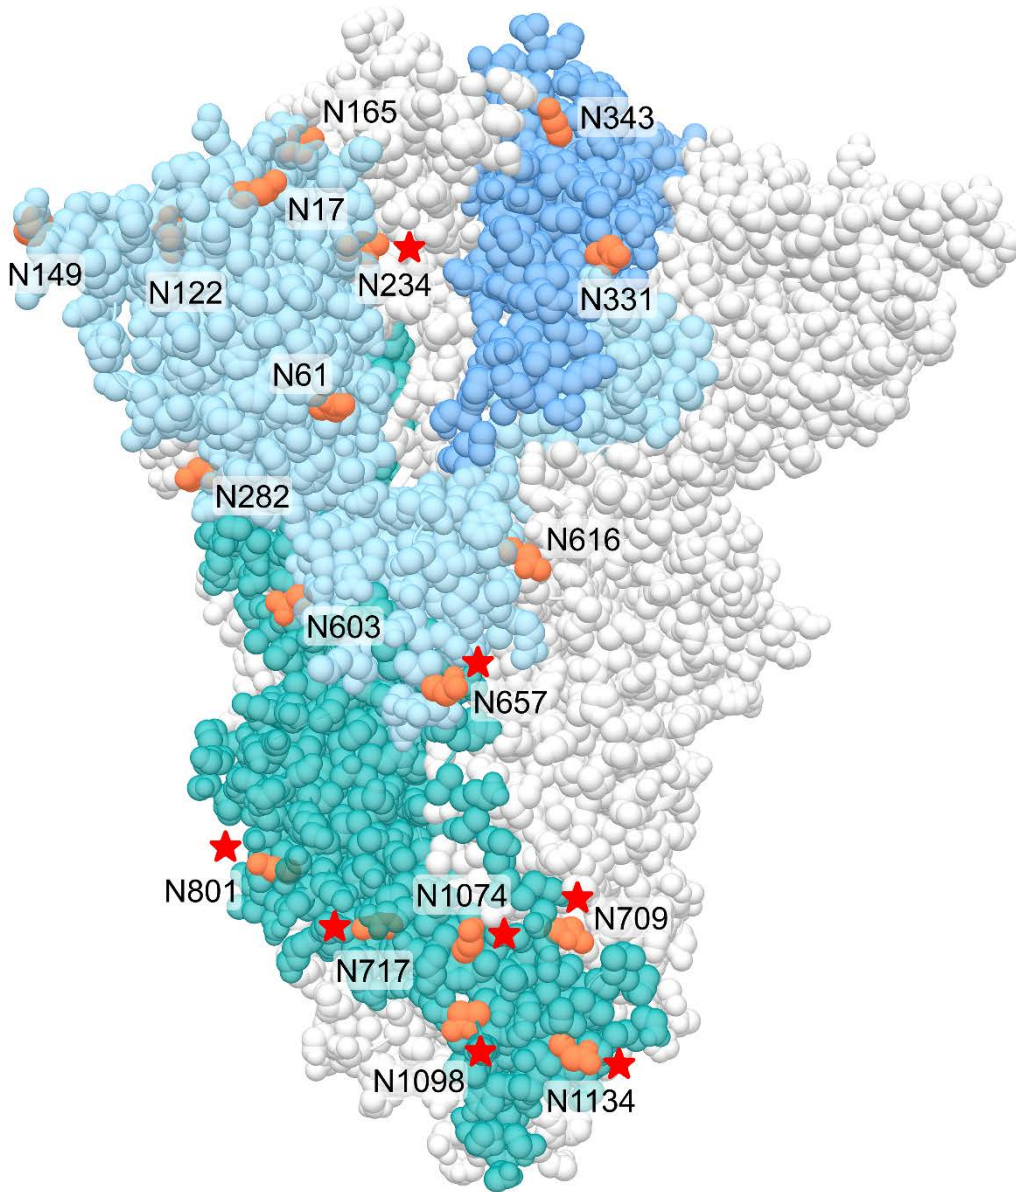

800

801 **Figure 6**

802 **Table 1.** Antiviral activity of UDA against live SARS-CoV-2 virus in different cell lines.

| SARS-CoV-2 strain | UDA IC <sub>50</sub> (nM) |                        |                                         |
|-------------------|---------------------------|------------------------|-----------------------------------------|
|                   | Vero E6 <sup>a</sup>      | U87.ACE2 <sup>+b</sup> | A549.ACE2 <sup>+</sup> -T2 <sup>a</sup> |
| Wuhan-Hu-1        | 225 ± 71                  | 984 ± 353              | 39.6 ± 6.5                              |
| 20A.EU2           | 160 ± 33                  | nd                     | 96.1 ± 28.0                             |
| Alpha             | 115 ± 69                  | nd                     | nd                                      |
| Beta              | 118 ± 73                  | nd                     | nd                                      |
| Gamma             | 171 ± 60                  | nd                     | nd                                      |
| Delta             | nd                        | 1555 ± 106             | nd                                      |
| Omicron           | nd                        | 867 ± 731              | nd                                      |

803 <sup>a</sup>Antiviral activity determined by RT-qPCR quantification of viral copy numbers of N gene  
 804 in supernatant of infected cells. Mean ± SD; n=3.

805 <sup>b</sup>Antiviral activity determined by cell viability readout with MTS to quantify virus-induced  
 806 cytopathic effect. Mean ± SD; n=3, except for Delta for which n=2.

807 IC<sub>50</sub>: the median inhibitory concentration 50%, or the concentration that inhibited SARS-  
 808 CoV-2 infection by 50%; nd: not determined; T2: TMPRSS2.

809

810 **Table 2.** Antiviral activity of UDA against glycosylation mutants of  
811 pseudotyped SARS-CoV-2.

| SARS-CoV-2 PV mutant | UDA IC <sub>50</sub> (nM) <sup>a</sup> |
|----------------------|----------------------------------------|
| WT                   | 330 ± 125                              |
| N1074Q; N1098Q       | 157 ± 65                               |
| N1134Q; N1158Q       | 220 ± 115                              |
| N1173Q; N1194Q       | 146 ± 27                               |
| N709Q; N717Q; N801Q  | nd <sup>b</sup>                        |
| N234Q; N709Q         | 390 ± 203                              |
| N657Q                | 435 ± 216                              |

812 <sup>a</sup>Antiviral activity determined by GFP quantification of PV-transduced A549.ACE2+  
813 TMPRSS2 cells. A549.ACE2+ cells were transiently transfected with TMPRSS2 and  
814 subsequently exposed to pseudotyped SARS-CoV-2 expressing GFP. Mean ± SD; n=3,  
815 except for WT for which n=4 and S501 for which n=2.

816 <sup>b</sup>Mutant could not be analysed because of very low expression of spike protein.

817 nd: not determined
