# Supplementary material for: Carbohydrate-Binding Protein from Stinging Nettle as Fusion Inhibitor for SARS-CoV-2 Variants of Concern
Source: bioRxiv or medRxiv preprint supplement (doi:10.1101/2022.07.08.499297), 2022-07-08
Supplement: Supplementary file [file media-1.pdf]

*Supplementary Material*

1 Supplementary Figures

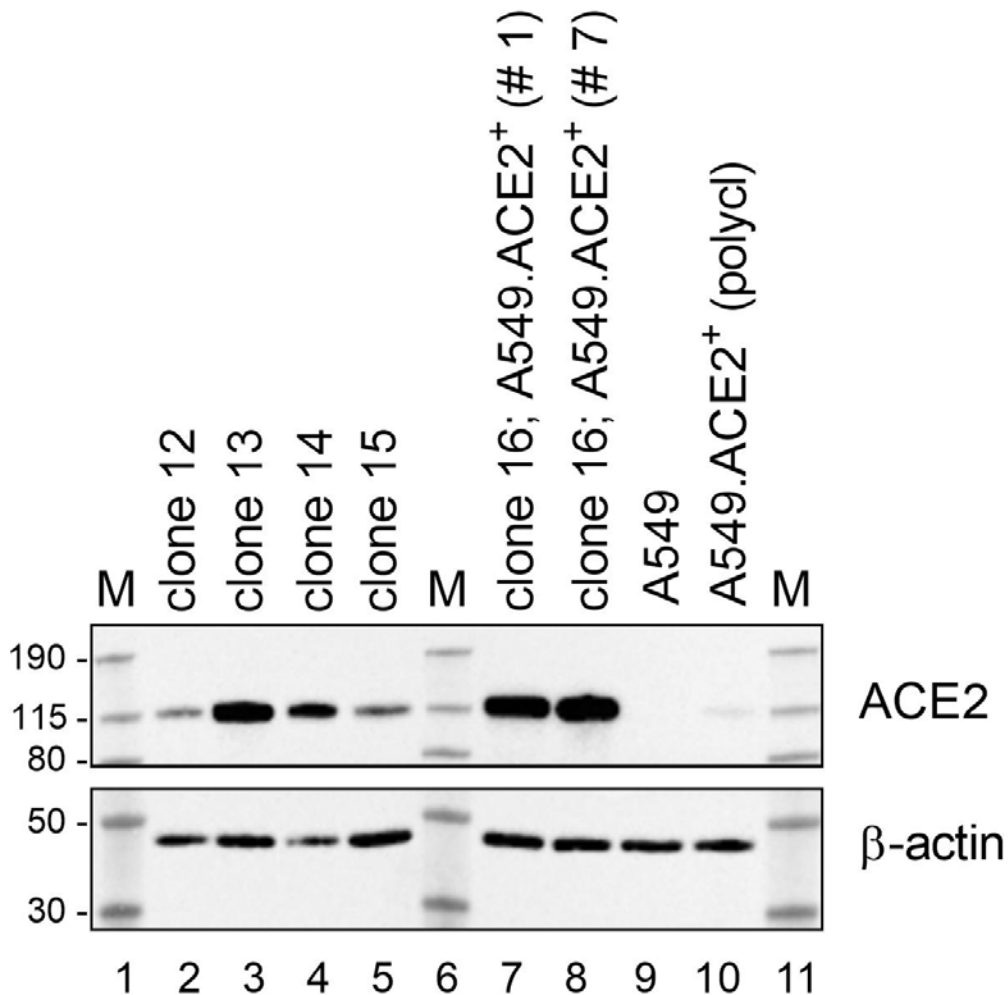

**Supplementary Figure 1.** Stable expression of ACE2 in transduced A549.ACE2<sup>+</sup> cells. Different clones of A549 cells were analysed for ACE2 expression by immunoblotting, with  $\beta$ -actin as loading control. Clone 16 was selected for this study. The stably ACE2 transduced A549 cells (clone 16) were tested at an early (# 1) and later (# 7) passage of the cells (lanes 7 and 8, respectively). The parental A549 cells did not express detectable levels of ACE2 (lane 9). The polyclonal mixture (polycl) of ACE2-transduced A549 cells is also included (lane 10), showing some expression of ACE2. M; molecular marker in kDa.

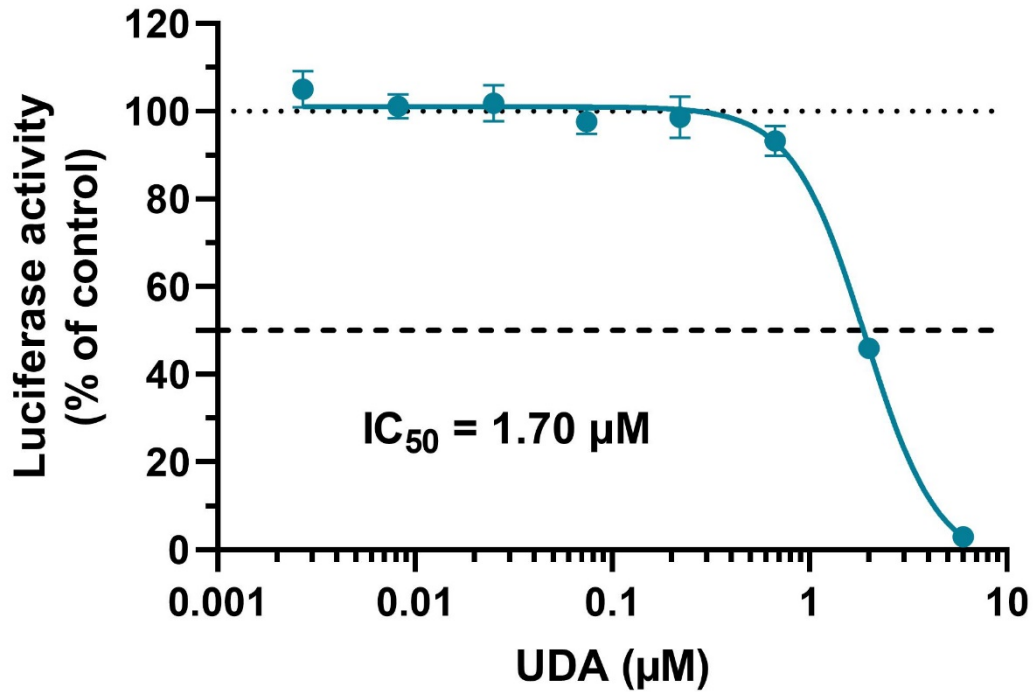

**Supplementary Figure 2.** Antiviral activity of UDA against pseudotyped Delta SARS-CoV-2. UDA was tested against luciferase-based pseudotyped SARS-CoV-2 (expressing the spike from the Delta VOC) in commercially available A549.ACE2<sup>+</sup>.TMPRSS2<sup>+</sup> cells. At 22h after VLP transduction, luciferase activity was measured. Graph represents a concentration-response of UDA from 2 biological replicates in quadruple (mean ± SD; n=8).

**A**

| Ligand/Analyte             | $k_a$<br>( $\times 10^5 \text{ M}^{-1}\text{s}^{-1}$ ) | $k_d$<br>( $\times 10^{-5} \text{ s}^{-1}$ ) | $K_D$<br>(nM)     |
|----------------------------|--------------------------------------------------------|----------------------------------------------|-------------------|
| Wuhan-Hu-1 spike/UDA (n=8) | $3.37 \pm 0.22$                                        | $240.43 \pm 13.03$                           | $7.37 \pm 0.92$   |
| Omicron spike/UDA (n=4)    | $3.49 \pm 0.20$                                        | $364.55 \pm 9.25$                            | $10.58 \pm 0.82$  |
| Wuhan-Hu-1 RBD/UDA (n=2)   | $3.10 \pm 0.60$                                        | $709.50 \pm 221.50$                          | $22.35 \pm 2.85$  |
| Wuhan-Hu-1 RBD/R001 (n=3)  | $19.70 \pm 0.87$                                       | $4.17 \pm 0.17$                              | $0.020 \pm 0.001$ |
| Wuhan-Hu-1 RBD/R007 (n=6)  | $2.93 \pm 0.37$                                        | $16.80 \pm 0.89$                             | $0.66 \pm 0.15$   |
| Wuhan-Hu-1 RBD/R007 (n=2)* | $4.00 \pm 0.77$                                        | $15.25 \pm 1.35$                             | $0.39 \pm 0.04$   |

**B**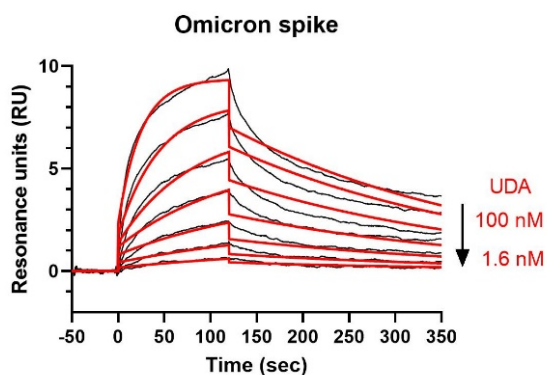**C**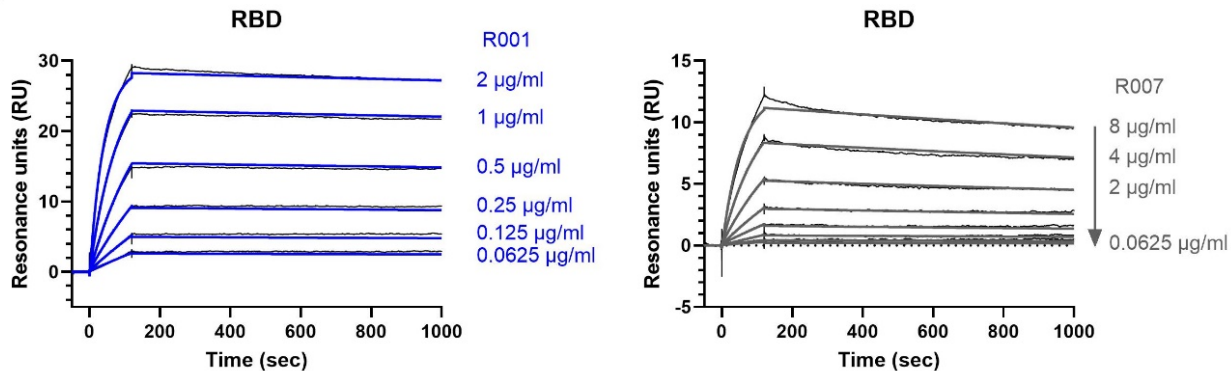

**Supplementary Figure 3.** Surface plasmon resonance (SPR) analysis of UDA and spike-binding antibodies R001 and R007. (A) Summary of the kinetics parameters from different repeat SPR experiments performed in this study. Given are the association rate constant ( $k_a$ ), the dissociation rate constant ( $k_d$ ), and the dissociation equilibrium constant ( $K_D$ ). Values are mean  $\pm$  SEM. (\*) For the

interaction of R007 to RBD, two different sensor chips were used, an NTA chip (n=8) or an CM5 chip (n=2). **(B)** SPR sensorgram showing the binding kinetics for UDA and immobilized monomeric Omicron spike protein (1:2 dilutions of UDA, starting from 100 nM). Data are shown as black lines, and the best fit of the data to a 1:1 binding model is shown in red. **(C)** SPR sensorgrams showing the binding kinetics for spike-binding antibodies and immobilized RBD of Wuhan-Hu-1 spike. Left panel shows sensorgram for the spike-neutralising antibody R001 and right panel that of the non-neutralising spike-binding antibody R007. Data are shown as black lines, and the best fit of the data to a 1:1 binding model is shown in blue or grey, respectively. SPR: surface plasmon resonance; RBD: receptor binding domain; UDA: *Urtica dioica* agglutinin; NTA: nitrilotriacetic acid.

**A**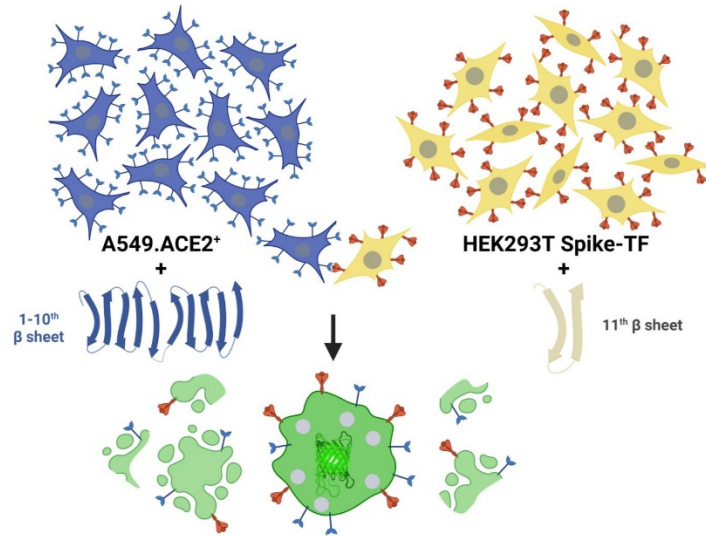**B**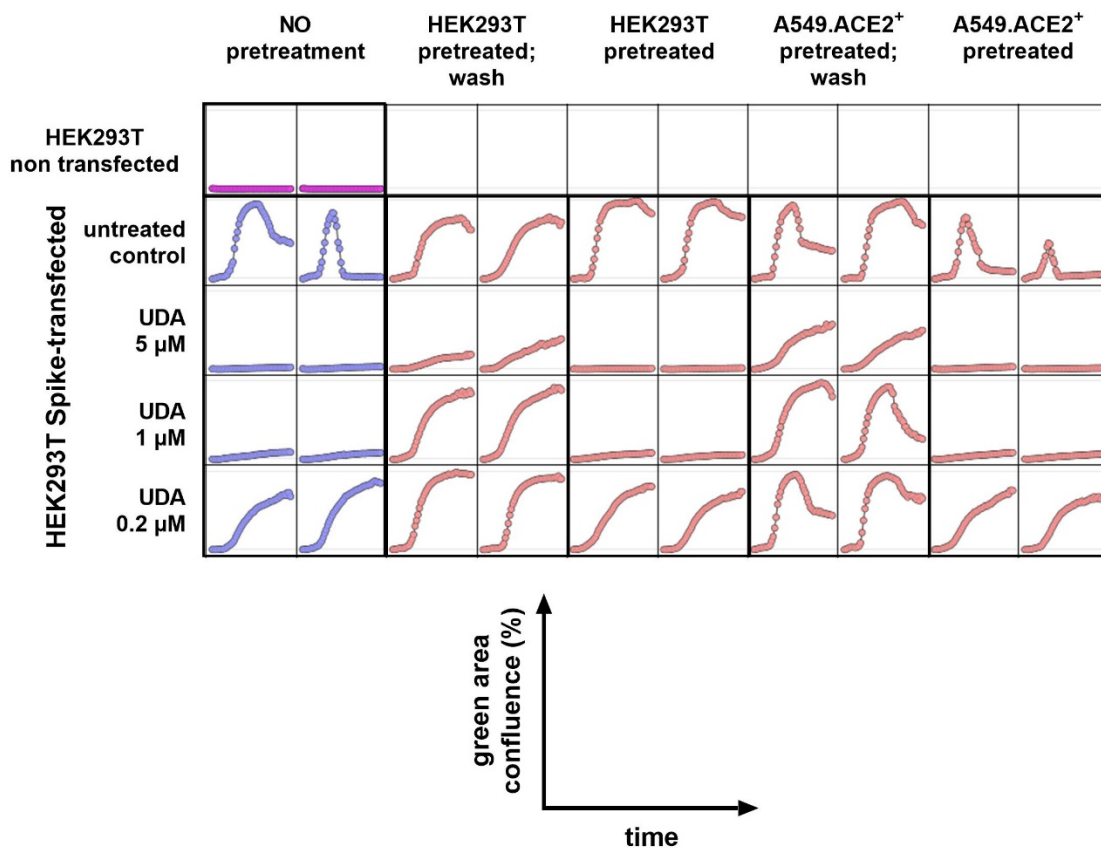

**Supplementary Figure 4.** UDA prevents cell-cell fusion of A549.ACE2<sup>+</sup> cells with spike-expressing HEK293T cells. (A) A549.ACE2<sup>+</sup> cells (transfected to express the first 10 betasheets of neogreen) were overlaid with HEK293T cells co-transfected with a plasmid encoding the SARS-CoV-2 spike protein and a plasmid encoding the 11<sup>th</sup> betasheet of neogreen. Only cell-cell fusion of an A549 cell

with a HEK293T cell will result in the assembly of a functional neongreen protein and give a green fluorescence signal. **(B)** Samples from Figure 5 were analysed for neongreen expression (for specification of the samples, see legend to Figure 5). Each condition was tested in 2 replicate wells (side-by-side columns), and in each well 4 different areas of the cell culture were monitored using an Incucyte live-cell analysis instrument. The increase in neongreen expression over time (17 hours) is plotted as percentage of green area confluence. Each individual plot shows the average signal of the 4 different areas of the cell culture (mean; n=4). Note that because of lysis of the syncytia, the fluorescent protein is diluted in the culture medium, resulting in a drop in the neongreen signal at later time points.

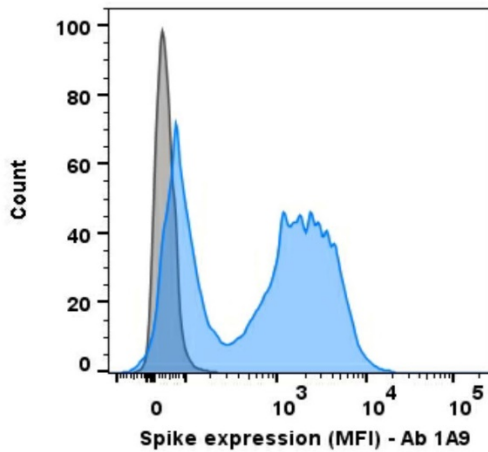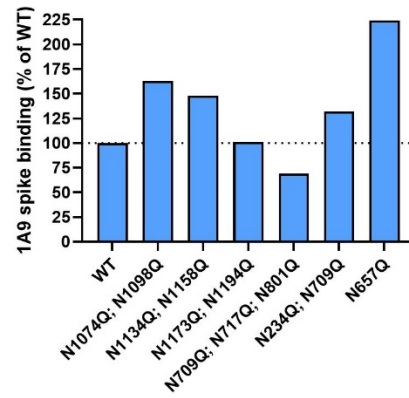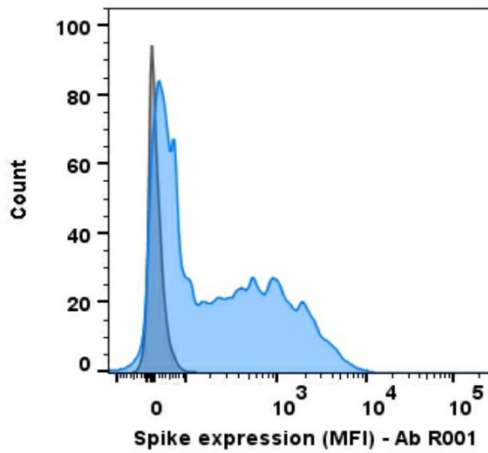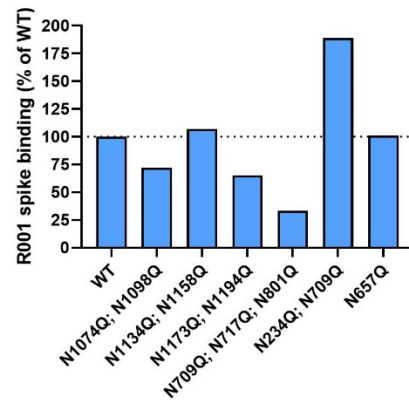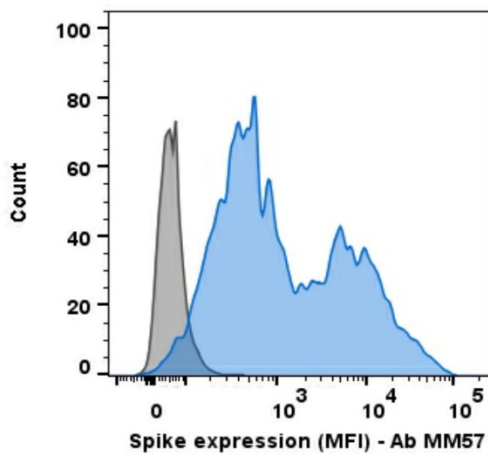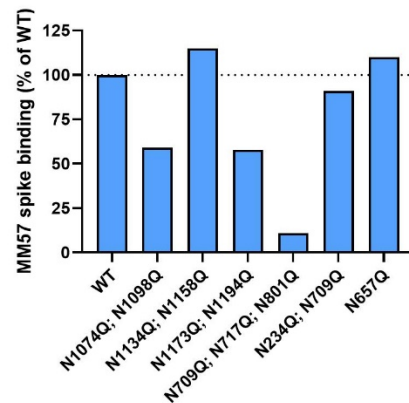

**Supplementary Figure 5.** Cell surface spike expression of different N-glycosylation mutants. HEK293T cells were transfected with a plasmid encoding the wild-type (WT) SARS-CoV-2 spike protein or an N-glycosylation deletion mutant. At 24h post transfection, cells were collected and stained with three different anti-spike antibodies (as indicated) to determine the cell surface expression of S.

## Supplementary Material

Histogram plots on the left show the mean fluorescence intensity (MFI) of S protein expression for non-transfected (grey) and WT S-transfected (blue) HEK293T cells. Flow cytometric data were collected from approximately 6,000 analyzed cells. The bar graphs on the right show S expression for the different spike mutants as determined by staining with the corresponding anti-spike antibody (as indicated). Bars represent the MFI relative to the WT control.



## 2 Supplementary Movie

**Supplementary movie.** A549.ACE2<sup>+</sup> cells (transfected to express the first 10 betasheets of neongreen) were overlayed with HEK293T cells co-transfected with a plasmid encoding the SARS-CoV-2 spike protein and a plasmid encoding the 11<sup>th</sup> betasheet of neongreen. Overlay was done in the absence (untreated control; left) or presence of UDA (1  $\mu$ M; right). Fusion events were visualized using the IncuCyte® S3 Live-Cell Analysis System (Sartorius). Phase contrast and GFP images were taken using a 20x objective lens at 20 minute intervals for a 24 hours period. Image processing was performed using the IncuCyte software.
